---

# BAYESIAN CALIBRATION, PROCESS MODELING AND UNCERTAINTY QUANTIFICATION IN BIOTECHNOLOGY

---

Laura Marie Helleckes<sup>+,1,2</sup>, Michael Osthege<sup>+,1,2</sup>, Wolfgang Wiechert<sup>1,2</sup>, Eric von Lieres<sup>1,2</sup>, Marco Oldiges<sup>\*,1,2</sup>

<sup>+</sup>Contributed equally

<sup>1</sup>Forschungszentrum Jülich GmbH, 52428 Jülich, Germany

<sup>2</sup>RWTH Aachen University, 52062 Aachen, Germany

\*Corresponding author

June 14, 2021

## ABSTRACT

1 High-throughput experimentation has revolutionized data-driven experimental sciences and opened  
2 the door to the application of machine learning techniques. Nevertheless, the quality of any data  
3 analysis strongly depends on the quality of the data and specifically the degree to which random  
4 effects in the experimental data-generating process are quantified and accounted for. Accordingly  
5 calibration, i.e. the quantitative association between observed quantities with measurement responses,  
6 is a core element of many workflows in experimental sciences. Particularly in life sciences, univariate  
7 calibration, often involving non-linear saturation effects, must be performed to extract quantitative  
8 information from measured data. At the same time, the estimation of uncertainty is inseparably  
9 connected to quantitative experimentation. Adequate *calibration models* that describe not only the in-  
10 put/output relationship in a measurement system, but also its inherent measurement noise are required.  
11 Due to its mathematical nature, statistically robust calibration modeling remains a challenge for many  
12 practitioners, at the same time being extremely beneficial for machine learning applications. In this  
13 work, we present a bottom-up conceptual and computational approach that solves many problems  
14 of understanding and implementing non-linear, empirical calibration modeling for quantification  
15 of analytes and process modeling. The methodology is first applied to the optical measurement of  
16 biomass concentrations in a high-throughput cultivation system, then to the quantification of glucose  
17 by an automated enzymatic assay. We implemented the conceptual framework in two Python pack-  
18 ages, with which we demonstrate how it makes uncertainty quantification for various calibration tasks  
19 more accessible. Our software packages enable more reproducible and automatable data analysis  
20 routines compared to commonly observed workflows in life sciences. Subsequently, we combine  
21 the previously established calibration models with a hierarchical Monod-like differential equation  
22 model of microbial growth to describe multiple replicates of *Corynebacterium glutamicum* batch  
23 microbioreactor cultures. Key process model parameters are learned by both maximum likelihood  
24 estimation and Bayesian inference, highlighting the flexibility of the statistical and computational  
25 framework.

26 **Keywords** nonlinear calibration · calibration modeling · quantitative measurement · process modeling · ODE  
27 modeling · maximum likelihood · Python · Bayesian methods · uncertainty quantification

## 28 1 Introduction

### 29 1.1 Calibration in life sciences

30 Calibration modeling is an omnipresent task in experimental science. Particularly the life sciences make heavy use of  
31 calibration modeling to achieve quantitative insights from experimental data. The importance of *calibration models*

(also known as *calibration curves*) in bioanalytics is underlined in dedicated guidance documents by EMA and FDA [1, 2] that also make recommendations for many related aspects such as method development and validation. While liquid chromatography and mass spectrometry are typically calibrated with linear models [3], a four- or five-parameter logistic model is often used for immuno- or ligand-binding assays [2, 4–6]. The aforementioned guidance documents focus on health-related applications, but there are countless examples where (non-linear) calibration needs to be applied across biological disciplines. From dose-response curves in toxicology to absorbance or fluorescence measurements, or the calibration of *on-line* measurement systems, experimentalists are confronted with the task of calibration. At the same time, recent advances in affordable liquid-handling robotics facilitate lab scientists in chemistry and biotechnology to (partially) automate their specialized assays (e.g. [7, 8]). Moreover, advanced robotic platforms for parallelized experimentation, monitoring and analytics [8, 9] motivate *on-line* data analysis and calibration for process control of running experiments.

## 1.2 Generalized computational methods for calibration

Experimental challenges in calibration are often unique to a particular field and require domain knowledge to be solved. At the same time, the statistical or computational aspects of the workflow can be generalized across domains. With the increased amount of available data in high-throughput experimentation comes the need for equally rapid data analysis and calibration. As a consequence, it is highly desirable to develop an automatable, technology-agnostic and easy-to-use framework for quantitative data analysis with calibration models.

From our perspective of working at the intersection between laboratory automation and modeling, we identified a set of requirements for calibration: Data analyses rely more and more on scripting languages such as Python or R, making the use of spreadsheet programs an inconvenient bottleneck. At various levels, and in particular when non-linear calibration models are involved, the statistically sound handling of uncertainty is at the core of a quantitative data analysis.

Before going into detail about the calibration workflow, we would like to highlight its most important aspects and terminology based on the definition of calibration by the *International Bureau of Weights and Measures* (BIPM) [10]:

**2.39 calibration:** "Operation that, under specified conditions, in a first step, establishes a relation between the quantity values with measurement uncertainties provided by measurement standards and corresponding indications with associated measurement uncertainties and, in a second step, uses this information to establish a relation for obtaining a **measurement result** from an indication."

**2.9 measurement result:** "[...] A measurement result is generally expressed as a single measured quantity value and a measurement uncertainty."

The "*first step*" from the BIPM definition is the establishment of a relation that we will call *calibration model* henceforth. In statistical terminology, the relationship is established between an *independent* variable (BIPM: *quantity values*) and a *dependent* variable (BIPM: *indications*) and it is important to note that the description of measurement uncertainty is a central aspect of a calibration model. In the application ("*second step*") of the calibration model, the quantification of uncertainty is a core aspect as well.

Uncertainty arises from the fact that measurements are not exact, but subject to some form of random effects. While many methods assume that these random effects are distributed according to a *normal* distribution, we want to stress that a generalized framework for calibration should not make such constraints. Instead, domain experts should be enabled to choose a probability distribution that is best suited to describe their measurement system at hand.

Going beyond the BIPM definition, we see the application of calibration models two-fold:

- Inference of individual independent quantity values from one or more observations.
- Inferring the parameters of a more comprehensive *process model* from measurement responses obtained from (samples of) the system.

For both applications, uncertainties should be a standard outcome of the analysis. In life sciences, the commonly used estimate of uncertainty is the *confidence interval*. The interpretation of confidence intervals however is challenging, as it is often oversimplified and confused with other probability measures [11, 12]. Furthermore, their correct implementation for non-linear calibration models, and particularly in combination with complex process models, is technically demanding. For this reason, we use Bayesian *credible intervals* that are interpreted as the range in which an unobserved parameter lies with a certain probability [13]. In 2.3 we go into more details about the uncertainty measures and how they are obtained and interpreted.

Even though high-level conventions and recommendations exist, the task of calibration is approached with different statistical methodology across the experimental sciences. In laboratory automation, we see a lack of tools enabling practitioners to build tailored calibration models while maintaining a generalized approach. At the same time, generalized calibration models have the potential to improve adequacy of complex simulations in the related fields.

85 While numerous software packages for modeling biological systems are available, most are targeted towards complex  
86 biological networks and do not consider calibration modeling or application to large hierarchical datasets. Notable  
87 examples are Data2Dynamics [14] or PESTO [15], both allowing to customize calibration models and the way the  
88 measurement error is described. However, both tools are implemented in MATLAB and are thus incompatible with  
89 data analysis workflows that leverage the rich ecosystem of scientific Python libraries. Here, Python packages such as  
90 PyCoTools3 [16] for the popular COPASI software [17] provide valuable functionality, but are limited with respect  
91 to custom calibration models, especially in a Bayesian modeling context. To the best of our knowledge, no Python  
92 framework exists so far that provides customized calibration models that are at the same time compatible with Bayesian  
93 modeling, provide profound uncertainty analysis and modular application with other libraries.

### 94 1.3 Aim of this study

95 This study aims to build an understanding of how *calibration models* can be constructed to describe both *location* and  
96 *spread* of measurement outcomes such that uncertainty can be quantified. In two parts, we demonstrate a toolbox for  
97 calibration models on the basis of application examples, thus showing how it directly addresses questions typical for  
98 quantitative data analysis.

99 In part one ([Section 4.1](#)) we demonstrate how to construct such calibration models based on a reparametrized asymmetric  
100 logistic function applied to a photometric assay. We give recommendations for obtaining calibration data and introduce  
101 accompanying open-source Python software that implements object-oriented calibration models with a variety of  
102 convenience functions.

103 In part two ([Section 4.2](#)) we show how calibration models can become part of elaborate *process models* to accurately  
104 describe measurement uncertainty caused by experimental limitations. We introduce a generic framework for refining  
105 a template process model into a hierarchical model that flexibly shares parameters across experimental replicates  
106 and connects the model prediction with observed data via the previously introduced calibration models. This generic  
107 framework is applied to build an ordinary differential equation (ODE) process model for 24 microbial growth curves  
108 gained in automated, high-throughput experiments. Finally, we demonstrate how the calibration model can be applied  
109 to perform maximum likelihood estimation or Bayesian inference of process model parameters while accounting for  
110 non-linearities in the experimental observation process.

111 Although this paper chooses biotechnological applications, the presented approach is generic and the framework thus  
112 applicable to a wide range of research fields.

## 113 2 Theoretical Background

### 114 2.1 Probability theory for calibration modeling

115 Probability distributions are at the heart of virtually all statistical and modeling methods. They describe the range of  
116 values that a variable of unknown value, also called *random variable*, may take, together with how likely these values  
117 are. This work focuses on *univariate* calibration tasks, where a continuous variable is obtained as the result of the  
118 measurement procedure. Univariate, continuous probability distributions such as the *Normal* or *Student's-t* distribution  
119 are therefore relevant in this context. Probability distributions are described by a set of parameters, such as  $\{\mu, \sigma\}$  in  
120 the case of a Normal distribution, or  $\{\mu, \text{scale}, \nu\}$  in the case of a Student's-t distribution.

121 To write that a random variable "rv" follows a certain distribution, the  $\sim$  symbol is used:  $rv \sim \text{Student's-t}(\mu, \text{scale}, \nu)$ .  
122 The most commonly found visual representation of a continuous probability distribution is in terms of its *probability*  
123 *density function* (PDF, [Figure 1](#)), typically written as  $p(rv)$ .

124 The term *rv conditioned on d* is used to refer to the probability that an observation of rv takes the value d. It is written  
125 as  $p(rv | d)$  and corresponds to the value of the PDF at position d.

126 A related term, the *likelihood*  $\mathcal{L}$ , takes the inverse perspective and is proportional to the probability of making the  
127 observation d, *given* that rv has a certain value ([Equation 1](#)). In practice,  $\mathcal{L}(rv | d)$  is often easy to access, whereas  
128  $p(d | rv)$  is hard to compute analytically. Therefore, most methods for the estimation of model parameters ([Section 2.2](#))  
129 exploit the proportionality and just use  $\mathcal{L}$ .

$$\mathcal{L}(rv | d) \propto p(d | rv) \tag{1}$$

130 When only considering the observed data, the probability of the random variable conditioned on data ( $p(rv | d)$ ), can be  
131 obtained by normalizing the likelihood by its integral ([Equation 2](#)).

$$p(\text{rv} \mid \text{d}) = \frac{\mathcal{L}(\text{rv} \mid \text{d})}{\int \mathcal{L}(\text{rv} \mid \text{d})} \quad (2)$$

132 In situations where only limited data is available, a Bayesian statistician argues that *prior* information should be taken  
 133 into account. The likelihood can then be combined with prior beliefs into a *posterior* probability according to Bayes’  
 134 rule [Equation 3](#).

$$p(\text{rv} \mid \text{d}) = \frac{p(\text{rv}) \cdot \mathcal{L}(\text{rv} \mid \text{d})}{\int p(\text{rv}) \cdot \mathcal{L}(\text{rv} \mid \text{d})} \quad (3)$$

135 According to [Equation 3](#), the posterior probability  $p(\text{rv} \mid \text{d})$  of the random variable  $\text{rv}$  given the data is equal to the  
 136 product of prior probability times likelihood, divided by its integral. From the Bayesian perspective, [Equation 2](#) can  
 137 be understood as a special case of Bayes’ rule [Equation 3](#) with flat (uninformative) prior information. For a thorough  
 138 introduction on Bayesian methods, we refer the interested reader to [18].

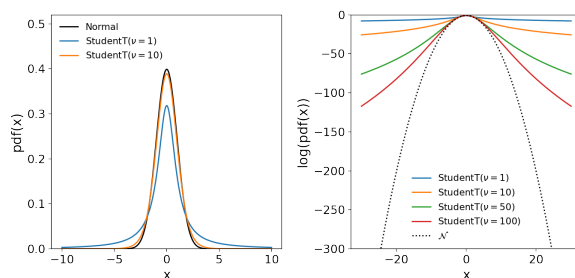

**Figure 1: Comparison between Normal and Student-t distribution**

In the left chart, the probability density function (PDF) of a Normal distribution, as well as two Student’s-t distributions with varying degree of freedom ( $\nu$ ) are shown. Both distributions are parametrized by a location parameter  $\mu$  that is equal to the mean and mode of these distributions. In addition to  $\mu$ , the Normal is parametrized by its standard deviation parameter  $\sigma$ , influencing the spread of the distribution. In contrast, the Student’s-t distribution has two spread parameters  $\{\text{scale}, \nu\}$  and is characterized by more probability mass in the tails of the PDF, not approaching 0 as quickly as the PDF of the Normal. With increasing  $\nu$ , the Student’s-t distribution becomes more similar to the Normal distribution. The log probability density (right) of the Normal distribution accelerates has a quadratic dependency on the distance to the mean, whereas the log-PDF of the Student’s-t distribution does not go to extreme values as quickly. Because of this property, the Student’s distribution causes less numerical problems at extreme values.

## 139 2.2 Parameter estimation

140 A mathematical model  $\phi$  is a function that describes the state of system variables by means of a set of parameters. The  
 141 model is a representation of the underlying *data generating process*, meaning that the model output from a given set of  
 142 parameters is imitating the expected output in the real system. From a known list of parameters  $\theta$ , a model can make  
 143 predictions of the system variables, in the following denominated as  $\vec{y}_{\text{pred}}$ . In Machine Learning, this quantity is often  
 144 called  $\hat{\vec{y}}$ .

$$\vec{y}_{\text{pred}} = \phi(\vec{\theta}) \quad (4)$$

145 A predictive model can be obtained when the parameters are estimated from observed experimental data  $\vec{y}_{\text{obs}}$ . In this  
 146 process, the experimental data is compared to data predicted by the model. In order to find the prediction matching  
 147 the data best, different approaches of *parameter estimation* can be applied, sometimes also referred to as *inference* or  
 148 informally as *fitting*.

149 To obtain one parameter vector, optimization of so-called *loss functions* or *objective functions* can be applied. In  
 150 principle, these functions compare prediction and measurement outcome, yielding a scalar that can be minimized.  
 151 Various loss functions can be formulated for the optimization process.

152 In the following, we first consider a special case, least squares estimation, before coming to the generalized approach of  
 153 maximum likelihood estimation (MLE). The former, which is often applied in biotechnology in the context of linear  
 154 regression, is specified in the following equation.



$$L = (\vec{y}_{\text{obs}} - \vec{y}_{\text{pred}})^2 \quad (5)$$

155 Here, the vectors  $\vec{y}_{\text{obs}}$  and  $\vec{y}_{\text{pred}}$  represent one observed time series and the corresponding prediction. If several time  
156 series contribute to the optimization, their differences (residuals) can be summed up:

$$L = \sum_{n=0}^N (\vec{y}_{\text{obs}, n} - \vec{y}_{\text{pred}, n})^2 \quad (6)$$

157 To keep the notation simple, we will in the following use  $Y_{\text{obs}}$  and  $Y_{\text{pred}}$  to refer to the set of  $N$  time series vectors.  
158 However, the vectors might be of different length and thus  $Y$  should not be interpreted as a matrix notation. In later  
159 chapters, we will see how the Python implementation handles the sets of observations ([Section 3.2.4](#)).  
160 Coming back to the likelihood functions introduced in the previous chapter, the residual-based loss functions are a  
161 special case of a broader estimation concept, the *maximum likelihood estimation* (MLE):

$$\vec{\theta}_{\text{MLE}} = \underset{\vec{\theta}}{\text{argmax}} \mathcal{L}(\vec{\theta} | Y_{\text{obs}}) \quad (7)$$

162 Here, a probability density function is used to quantify how well observation and prediction, the latter represented by  
163 the model parameters, match. In case of a Normal-distributed likelihood with constant noise, the result of MLE is the  
164 same as a weighted least-squares loss [19]. In comparison to residual-based approaches, the choice of the PDF in a  
165 likelihood approach leads to more flexibility, for example covering heteroscedasticity or measurement noise that cannot  
166 be described by a Normal distribution.

167 As introduced in [Section 2.1](#), an important extension of the likelihood approach is Bayes' theorem ([Equation 3](#)).  
168 Applying this concept, we can perform *Bayesian inference* of model parameters:

$$p(\vec{\theta} | Y_{\text{obs}}) = \frac{p(\vec{\theta}) \cdot \mathcal{L}(\vec{\theta} | Y_{\text{obs}})}{\int p(\vec{\theta}) \cdot \mathcal{L}(\vec{\theta} | Y_{\text{obs}})} \quad (8)$$

$$\vec{\theta}_{\text{MAP}} = \underset{\vec{\theta}}{\text{argmax}} p(\vec{\theta} | Y_{\text{obs}}) \quad (9)$$

169 Similar to MLE, a point estimate of the parameter vector with highest probability can be obtained by optimization  
170 ([Equation 9](#)), resulting in the *maximum a posteriori* (MAP) estimate. While the MLE is focused on the data-based  
171 likelihood, MAP estimates incorporate prior knowledge  $p(\vec{\theta})$  into the parameter estimation.

172 To obtain the full posterior distribution  $p(\vec{\theta} | Y_{\text{obs}})$ , which is describing the probability distribution of parameters  
173 given the observed data, one has to solve [Equation 8](#). The integral, however, is often intractable or impossible to solve  
174 analytically. Therefore, a class of algorithms called *Markov chain Monte Carlo* (MCMC) algorithms is often applied to  
175 find numerical approximations for the posterior distribution (for more detail, see [Section 3.2.6](#)).

176 The possibility to not only obtain point estimates, but to obtain a whole distribution describing the parameter vector, is  
177 leading to an important concept: uncertainty quantification.

### 178 2.3 Uncertainty quantification of model parameters

179 When aiming for predictive models, it is important to not only estimate one parameter vector, but to quantify how  
180 certain the estimation is. In the frequentist paradigm, uncertainty is quantified with *confidence intervals*. When applied  
181 correctly, they provide a useful measure, for example in hypothesis testing where the size of a certain effect in a  
182 study is to be determined. However, interpretation of the confidence interval can be challenging and it is frequently  
183 misinterpreted as the interval that has a 95% chance to contain the true effect size or true mean [11]. However, to obtain  
184 intervals with such a simple interpretation, further assumptions on model parameters are required [12].

185 In Bayesian inference, prior distribution provide these necessary assumptions and the posterior can be used for  
186 uncertainty quantification. As a consequence, Bayesian *credible intervals* can indeed be interpreted as the range in  
187 which an unobserved parameter lies with a certain probability [13]. The choice of probability level (e.g. 90 %) or  
188 interval bounds is arbitrary. Consequently, there are many equally valid flavors of credible intervals. The most important  
189 ones are:

- 190 • **Highest posterior density** intervals (HDI) are chosen such that the width of the interval is minimized

- 191 • **Equal-tailed** intervals (ETI) are chosen such that the probability mass of the posterior below and above the  
192 interval are equal  
193 • **Half-open** credible intervals specify the probability that the parameter lies on one side of a threshold

194 In the scope of this paper, we will solely focus on the Bayesian quantification of parameter uncertainty. Note that  
195 uncertainty of parameters should not be confused with the measurement uncertainty mentioned in the context of  
196 calibration in [Section 1.2](#), which will be further explained in the following section.

## 197 2.4 Calibration models

198 Coming back to the BIPM definition of calibration ([Section 1.1](#)), we can now associate aspects of that definition  
199 with the statistical modeling terminology. In [Figure 2](#) (left), the blue axis "independent" variable corresponds to the  
200 "quantity values" from the BIPM definition. At every value of the independent variable, the calibration model (green)  
201 describes the probability distribution (green slices) of measurement responses. This corresponds to the "indications  
202 with associated measurement uncertainties" from the BIPM definition.

203 Neither the formal definition, nor the conceptual framework presented in this study impose constraints on the kind of  
204 probability distribution that describes the measurement responses. Apart from the Normal distribution, a practitioner  
205 may choose a Student's-t distribution if outliers are a concern. The Student's-t distribution has a  $\nu$  parameter that  
206 influences how much probability is attributed to the tails of the distribution ([Figure 1](#)), or in other words how likely it is  
207 to observe extreme values. Depending on the measurement system at hand, a Lognormal, Gamma, Weibull, Uniform  
208 or other continuous distributions may be appropriate. Also discrete distributions such as the Poisson, Binomial or  
209 Categorical may be chosen to adequately represent the observation process.

210 For some distributions, including Normal and Student's-t, the parameters may be categorized as *location* parameters  
211 affecting the median or *spread* parameters affecting the variance, while for many other distributions the commonly  
212 used parameterization is less not as independent. The parameters of the probability distribution that models the  
213 measurement responses must be described as functions of the independent variable. In the example from [Figure 2](#),  
214 a Student's-t distribution with parameters  $\{\mu, \text{scale}, \nu\}$  is used. Its parameter  $\mu$  is modeled with a logistic function,  
215 the scale parameter as a 1st order polynomial of  $\mu$  and  $\nu$  is kept constant. It should be emphasized that the choice of  
216 probability distribution and functions to model its parameters is completely up to the domain expert.

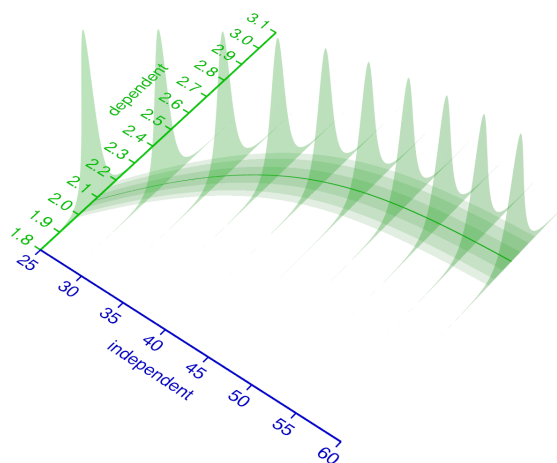

**Figure 2: Relationship of independent and dependent variable**

The distribution of measurement responses (dependent variable) can be modeled as a function of the independent variable. This measurement response probability distribution (here: Student's-t) is parametrized by its parameters the mean  $\mu$  (solid green line) and spread parameters  $\sigma$  and  $\nu$ . Some or all of the distributions parameters are modeled as a function of the independent variable.

217 When coming up with the structure of a calibration model, domain knowledge about the measurement system should  
218 be considered, particularly for the choice of probability distribution. An exploratory scatter plot can help to select an  
219 adequate function for the location parameter of the distribution ( $\mu$  in case of a Normal or Student's-t). A popular choice  
220 for measurement systems that exhibit saturation kinetics is the (asymmetric) logistic function. Many other measurement  
221 systems can be operated in a "linear range", hence a 1st order polynomial is an equally popular model for the location  
222 parameter of a distribution. To describe the spread parameters ( $\sigma$ , *scale*,  $\nu$ , ...), a 0th (constant) or 1st order (linear)  
223 polynomial function of the location parameter is often a reasonable choice.

224 After specifying the functions in the calibration model, the practitioner must fit the model (Section 2.2) and decide to  
225 stick with the result, or modify the functions in the model. This iteration between model specification and inspection,  
226 is a central aspect of modeling. A general recommendation is to find the simplest model that is in line with domain  
227 knowledge about the measurement system, while minimizing the *lack-of-fit*.  
228 The term *lack-of-fit* is used to describe systematic deviation between the model fit and data. It refers not only to the trend  
229 of location and spread parameters, but also to the kind of probability distribution. A *residual plot* is often instrumental to  
230 diagnose lack-of-fit and discriminate it from purely random noise in the observations. In Figure 3, different calibration  
231 models (top), residuals (middle) and the spread of data points along the predicted probability distribution (bottom)  
232 illustrate how to diagnose a lack-of-fit. A well-chosen model (D) is characterized by the random spread of residuals  
233 without systematic deviation and the equivalence of the modeled and observed distribution. When enough calibration  
234 data points are available, the modeled and observed distributions can be compared via the occupancy of percentiles.

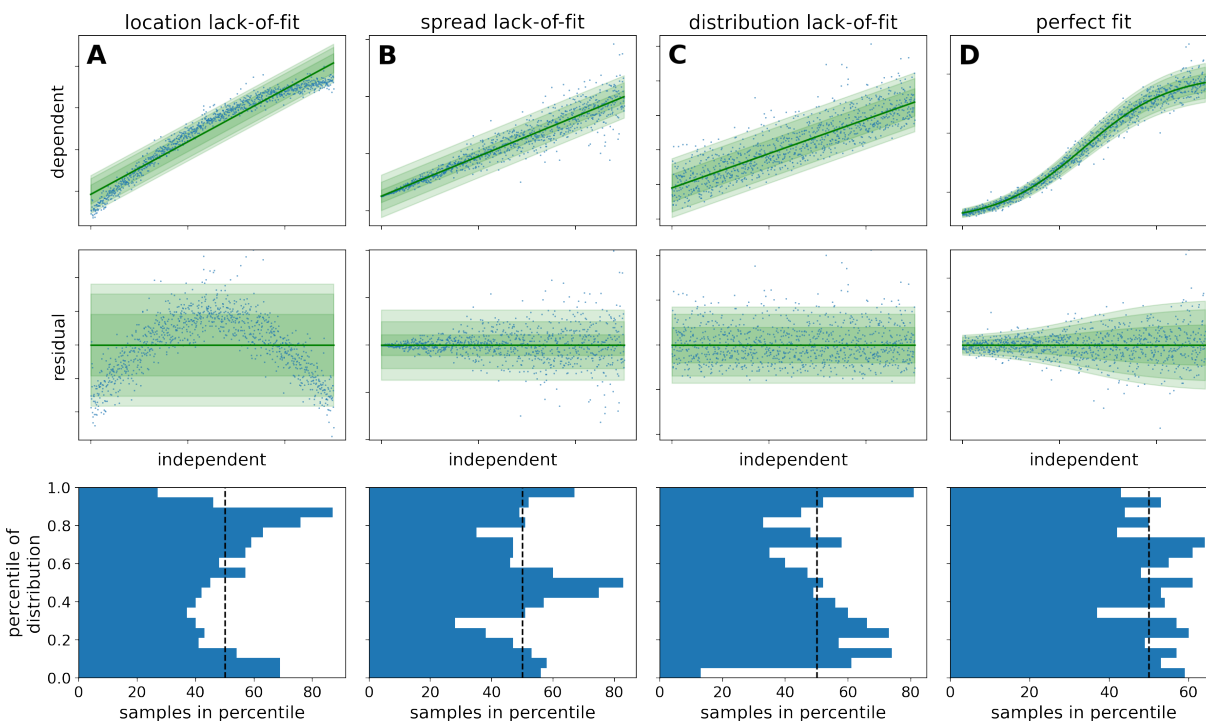

**Figure 3: Diagnostic plots of model fits**

Linear and logistic models were fitted to synthetic data to show three kinds of *lack-of-fit* error (columns 1-3) in comparison to a perfect fit (column 4). The underlying structure of the data and model is as follows: **A**: Homoscedastic linear model, fitted to homoscedastic nonlinear data **B**: Homoscedastic linear model, fitted to heteroscedastic linear data **C**: Homoscedastic linear model, fitted to homoscedastic linear data that is Lognormal-distributed **D**: Heteroscedastic logistic model, fitted to heteroscedastic logistic data The raw data (blue dots) and corresponding fit is visualized in the top row alongside a density band that corresponds to the regions of highest likelihood according to the model. The residual plots in the middle row show the distance between the data and the modeled location parameter (green line). The bottom row shows how many data points fall into the percentiles of the predicted probability distribution. Whereas the lack-of-fit cases exhibit systematic under- and over-occupancy of percentiles, only in the perfect fit case all percentiles are approximately equally occupied.

235 Whereas the BIPM definition uses the word *uncertainty* in multiple contexts, we prefer to always use the term to  
236 describe *uncertainty in a parameter*, but never to refer to measurement noise. In other words, the parameter uncertainty  
237 can often be reduced by acquiring more data, whereas measurement noise is inherent and constant. In the context of  
238 calibration models, the methods for uncertainty quantification (Section 2.3) may be applied to the calibration model  
239 parameters, the independent variable, or both. Uncertainty quantification of calibration model parameters can be useful  
240 when investigating the structure of the calibration model itself, or when optimization does not yield a reliable fit.  
241 Because the independent variable is in most cases the parameter of interest in the application of a calibration model,  
242 the quantification of uncertainty about the independent variable is typically the goal. To keep the examples easy and

243 understandable, we fix calibration model parameters at their maximum likelihood estimate; however, we would like to  
244 point out that `calibr8` does not make this restriction.

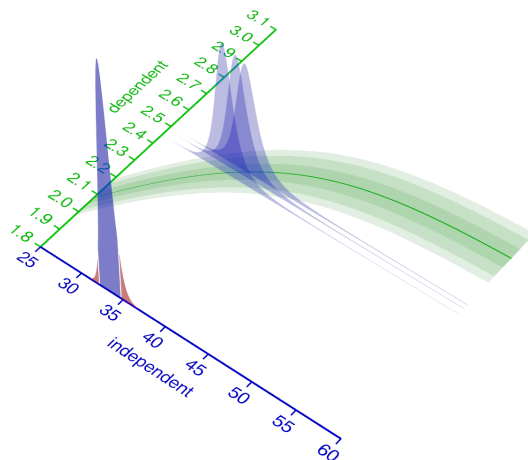

**Figure 4: Uncertainty about the independent variable**

An intuition for inferring the independent variable from an observed dependent variable is to cut (condition) the green probability distribution model at the observed value (blue slices) and normalize its area to 1. The resulting (blue) slice is a potentially asymmetric probability distribution that describes the likelihood of the observation, given the independent variable. Its maximum (the maximum likelihood estimate) is the value of the independent variable that best describes the observation. For multiple observations, the probability density function for the independent variable corresponds to the product of the PDFs of the observations. The red shoulders mark the regions outside of the 90 % equal-tailed interval.

245 In Figure 4, the green likelihood bands on the ground of the 3D plot represent a calibration model with fixed parameters.  
246 To quantify the independent variable with associated Bayesian uncertainty, it must be considered as a random variable.  
247 Accordingly,  $p(rv_{\text{independent}} \mid d)$  from either a likelihoodist (Equation 2) or Bayesian (Equation 3) perspective is the  
248 desired outcome of the uncertainty quantification.  
249 Given a single observed dependent variable, the likelihoodist  $p(rv_{\text{independent}} \mid d)$  (Equation 2) corresponds to the  
250 normalized cross-section of the likelihood bands at the observed dependent variable (Figure 4, blue slices). With  
251 multiple observations,  $p(rv_{\text{independent}} \mid d)$  becomes the product (superposition) of the elementwise likelihoods (Figure 4,  
252 blue slice at the axis). For a Bayesian interpretation of  $p(rv_{\text{independent}} \mid d)$  (Equation 3), the blue likelihood slice is  
253 superimposed with an additional prior distribution (not shown). More practical details on uncertainty quantification of  
254 the independent variable in a calibration model are given in Section 4.

## 255 2.5 Process models

256 Most research questions are not answered by inferring a single variable from some observations. Instead, typical  
257 questions target the comparison between multiple conditions, the value of an *latent* (unobservable) parameter, or  
258 the inter- and extrapolation of a temporally evolving system. For example, one might extract a latent parameter that  
259 constitutes a key performance indicator, or make decisions based on predictions (extrapolation) of new scenarios. Data  
260 analysis for all of these and many more scenarios is carried out with models that are tailored to the system or process  
261 under investigation. Such models are typically derived from theoretical (textbook) understanding of the process under  
262 investigation and in terms of SI units, but are not concerned with the means of making observations. Henceforth, we  
263 use the term *process model* ( $\phi_{\text{textpm}}$ ) to describe such models and discriminate them from calibration models ( $\phi_{\text{textcm}}$ )  
264 that are explicitly concerned with the observation procedure.  
265 Whereas calibration models are merely univariate input/output relationships of a measurement system, process models  
266 may involve many parameters, hierarchy, multivariate predictions or more complicated functions such as ordinary  
267 or partial differential equations (ODEs, PDEs). For example, they may predict a temporal evolution of a system  
268 with differential equations, sharing some parameters between different conditions, while keeping others local. In  
269 life-sciences, time series play a central role, hence our application example is also concerned with a temporally evolving  
270 system.  
271 Nevertheless, calibration models  $\phi_{\text{textcm}}$  and process models  $\phi_{\text{textpm}}$  are models, and the methods for estimation  
272 of their parameters (Section 2.2) as well as uncertainty quantification (Section 2.3) apply to both. As described in  
273 Section 2.3, the likelihood  $\mathcal{L}$  is the ultimate all-rounder tool in parameter estimation. The key behind our proposed

274 discrimination between calibration and process models is the observation that a calibration model can serve as a modular  
275 likelihood function for a process model (Equation 10).

$$\begin{aligned} Y_{\text{pred}} &= \phi_{\text{pm}}(\vec{\theta}_{\text{pm}}) \\ \mathcal{L}(\vec{\theta}_{\text{pm}} | Y_{\text{obs}}) &= \mathcal{L}(Y_{\text{pred}} | Y_{\text{obs}}) \\ \mathcal{L}(Y_{\text{pred}} | Y_{\text{obs}}) &\propto p(Y_{\text{obs}} | \phi_{\text{cm}}(Y_{\text{pred}}, \vec{\theta}_{\text{cm}})) \end{aligned} \quad (10)$$

276 Conceptually separating between calibration models and process models has many advantages for the data analysis  
277 workflow in general. After going into more detail about the implementation of calibration models and process models  
278 in Section 3, we will demonstrate their application and combination in Section 4.

## 279 3 Material and methods

### 280 3.1 Experimental workflows

#### 281 3.1.1 Automated microbioreactor platform

282 All experiments were conducted on a so-called automated microbioreactor platform. In our setup, a BioLector Pro  
283 microbioreactor system (m2p-labs GmbH, Baesweiler, Germany), is integrated into a Tecan Freedom EVO liquid  
284 handling robot (Tecan, Männedorf, Switzerland). The BioLector pro is a device to quasi-continuously observe biomass,  
285 pH and dissolved oxygen (DO) during cultivation of microorganisms in specialized microtiter plates (MTPs). These  
286 rectangular plates comprise multiple reaction cavities called "wells", usually with volumes in microliter or milliliter  
287 scale. The BioLector allows to control temperature and humidity while shaking the plates at adjustable frequencies  
288 between 800 and 1500 rpm.

289 The liquid handler, which allows to take samples for *at-line* measurements during cultivation, is surrounded by a laminar  
290 flow hood to ensure sterile conditions for liquid transfer operations. Next to the BioLector Pro, various other devices are  
291 available on the platform, including an Infinite<sup>®</sup> M Nano+ microplate photometer (Tecan, Männedorf, Switzerland), a  
292 cooling carrier and a Hettich Rotanta 460 robotic centrifuge (Andreas Hettich GmbH & Co. KG, Tuttlingen, Germany).  
293 The overall setup is similar to the one described by Unthan *et al.* 2015 [8]. The automated platform enables to perform  
294 growth experiments with different microorganisms, to autonomously take samples of the running process and to perform  
295 bioanalytical measurements, *e.g.* quantification of glucose. It is thus a device for miniaturised, automated bioprocess  
296 cultivation experiments.

297 In this work, we used pre-sterilized, disposable 48-well FlowerPlates<sup>®</sup> (MTP-48-B, m2p-labs GmbH, Baesweiler,  
298 Germany) covered with a gas-permeable sealing film with a pierced silicone layer for automation (m2p-labs GmbH,  
299 Baesweiler, Germany). The biomass was quasi-continuously detected via scattered light [20] at gain 3 with 4 minutes  
300 cycle time to obtain backscatter measurements. DO and pH were not measured since they are not relevant for the  
301 application examples. Both cultivation and biomass calibration experiments were conducted in the BioLector Pro at  
302 30 °C, 3 mm shaking diameter, 1400 rpm shaking frequency, 21% headspace oxygen concentration and  $\geq 85\%$  relative  
303 humidity.

#### 304 3.1.2 Strain, media preparation and cell banking and cultivation

305 The wild-type strain *Corynebacterium glutamicum* ATCC 13032 [21] was used in this study. If not stated otherwise, all  
306 chemicals were purchased from Sigma–Aldrich (Steinheim, Germany), Roche (Grenzach-Wyhlen, Germany) or Carl  
307 Roth (Karlsruhe, Germany) in analytical quality.

308 Cultivations were performed with CGXII defined medium with the following final amounts per liter of distilled water:  
309 20 g D-glucose, 20 g (NH<sub>4</sub>)<sub>2</sub>SO<sub>4</sub>, 1 g K<sub>2</sub>HPO<sub>4</sub>, 1 g KH<sub>2</sub>PO<sub>4</sub>, 5 g urea, 13.25 mg CaCl<sub>2</sub> · 2 H<sub>2</sub>O, 0.25 g MgSO<sub>4</sub> · 7 H<sub>2</sub>O,  
310 10 mg FeSO<sub>4</sub> · 7 H<sub>2</sub>O, 10 mg MnSO<sub>4</sub> · H<sub>2</sub>O, 0.02 mg NiCl<sub>2</sub> · 6 H<sub>2</sub>O, 0.313 mg CuSO<sub>4</sub> · 5 H<sub>2</sub>O, 1 mg ZnSO<sub>4</sub> · 7 H<sub>2</sub>O,  
311 0.2 mg biotin, 30 mg protocatechuic acid. 42 g/L MOPS were used as buffering agent and the pH was adjusted to 7.0  
312 using 4 M NaOH.

313 A working cell bank (WCB) was prepared from a shake flask culture containing 50 mL of the described CGXII medium  
314 and 10 % (v/v) brain heart infusion (BHI) medium (37 g/L). It was inoculated with 100 µl cryo culture from a master  
315 cell bank stored at -80°C. The culture was incubated for approximately 16 hours in an unbaffled shake flask with 500 ml  
316 nominal volume at 250 rpm, 25 mm shaking diameter and 30 °C. The culture broth was then centrifuged at 4000 × *g* for  
317 10 minutes at 4 °C and washed once in 0.9% sterile NaCl solution. After centrifugation, the pellets were resuspended  
318 in a suitable volume of NaCl solution to yield a suspension with an optical density at 600 nm (OD<sub>600</sub>) of 60. The  
319 suspension was then mixed with an equal volume of 50% (w/v) sterile glycerol, resulting in cryo cultures of OD<sub>600</sub> ≈ 30.



320 Aliquots of 1 mL were quickly transferred to low-temperature freezer vials, frozen in liquid nitrogen and stored at  
321  $-80^{\circ}\text{C}$ .

### 322 3.1.3 Algorithmic planning of dilution series

323 All calibration experiments require a set of *standards* (reference samples) with known concentrations, spanning across  
324 sometimes multiple orders of magnitude. Traditionally such standards are prepared by manually pipetting a serial  
325 dilution with a 2x dilution factor in each step. This can result in a series of standards whose concentrations are evenly  
326 spaced on a logarithmic scale. While easily planned, a serial dilution generally introduces inaccuracies that accumulate  
327 with an increasing number of dilution steps. It is therefore desirable to plan a dilution series of reference standards such  
328 that the number of serial dilution steps is minimized.

329 To reduce the planning effort and allow for a swift and accurate preparation of the standards, we devised an algorithm  
330 that plans liquid handling instructions for preparation of standards. Our `DilutionPlan` algorithm considers constraints  
331 of a  $(R \times C)$  grid geometry, well volume, minimum and maximum transfer volumes to generate pipetting instructions  
332 for human or robotic liquid handlers.

333 First, the algorithm reshapes a length  $R \cdot C$  vector of sorted target concentrations into the user specified  $(R \times C)$   
334 grid typically corresponding to a microtiter plate. Next, it iteratively plans the transfer- and filling volumes of grid  
335 columns subject to the volume constraints. This column-wise procedure improves the compatibility with multi-channel  
336 manual pipettes, or robotic liquid handlers. Diluting from a stock solution is prioritized over the (serial) dilution from  
337 already diluted columns. The result of the algorithm are (machine readable) pipetting instructions to create  $R \cdot C$  single  
338 replicates with concentrations very close to the targets. We open-sourced the implementation as part of the `robotools`  
339 library [22].

340 As the accuracy of the calibration model parameter estimate increases with the number of calibration points, we  
341 performed all calibrations with the maximum number of observations that the respective measurement system can make  
342 in parallel. The calibration with 96 glucose and 48 biomass concentrations is covered in the following chapters.

### 343 3.1.4 Glucose assay calibration

344 For the quantification of D-glucose, the commercial enzymatic assay kit "Glucose Hexokinase FS" (DiaSys Diagnostic  
345 Systems, Holzheim, Germany) was used. For the master mix, four parts buffer and one part enzyme solution were  
346 mixed manually. The master mix was freshly prepared for each experiment and incubated at room temperature for at  
347 least 30 minutes prior to the application for temperature stabilization. All other pipetting operations were performed  
348 with the robotic liquid handler. For the assay, 280  $\mu\text{L}$  master mix were added to 20  $\mu\text{L}$  analyte in transparent 96-well  
349 flat bottom polystyrol plates (Greiner Bio-One GmbH, Frickenhausen, Germany) and incubated for 6 minutes, followed  
350 by absorbance measurement at 365 nm. To treat standards and cultivation samples equally, both were diluted by a factor  
351 of 10 (100  $\mu\text{L}$  sample/standard + 900  $\mu\text{L}$  diluent) as part of the assay procedure.

352 As standards for calibration, 96 solutions with concentrations between 0.075 and 50 g/L were prepared from fresh  
353 CGXII cultivation medium (Section 3.1.2) with a 50 g/L concentration of D-glucose. The `DilutionPlan` algorithm  
354 (Section 3.1.3) was used to plan the serial dilution procedure with glucose-free CGXII media as the diluent, resulting  
355 in 96 unique concentrations, evenly distributed on a logarithmic scale. Absorbance results from the photometer were  
356 parsed with a custom Python package and paired with the concentrations from the serial dilution series to form the  
357 calibration dataset used in Section 4.1.2. 83 of the 96 concentration/absorbance pairs lie below 20 g/L and were used to  
358 fit a linear model in Section 4.1.1.

### 359 3.1.5 Biomass calibration

360 Calibration data for the biomass/backscatter calibration model Figure 9 was acquired by measuring 48 different biomass  
361 concentrations at cultivation conditions (Section 3.1.2) in the BioLector Pro. 100 mL *C. glutamicum* WT culture was  
362 grown overnight on 20 g/L glucose CGXII medium (Section 3.1.2) in two unbaffled 500 mL shake flasks with 50 mL  
363 culture volume each ( $N=250$  rpm,  $r=25$  mm). The cultures were harvested in the stationary phase, pooled, centrifuged  
364 and resuspended in 25 mL 0.9 %<sub>w/v</sub> NaCl solution. The highly concentrated biomass suspension was transferred into a  
365 magnetically stirred 100 mL trough on the liquid handler, for automated serial dilution with logarithmically evenly  
366 spaced dilution factors from  $1\times$  to  $1000\times$ . The serial dilution was prepared by the robotic liquid handler in a  $6 \times 8$   
367 (48-well square) deep well plate (Agilent Part number 201306-100) according to the `DilutionPlan` (Section 3.1.3).  
368 6x 800  $\mu\text{L}$  of biomass stock solution were transferred to previously dried and weighed 2 mL tubes, immediately after all  
369 transfers of stock solution to the 48 well plate had occurred. The 2 mL tubes were frozen at  $-80^{\circ}\text{C}$ , lyophilized over  
370 night, dried again at room temperature in a desiccator over night and finally weighted again to determine the biomass  
371 concentration in the stock solution.

372 After a column in the 48 well plate was diluted with 0.9 %<sub>w/v</sub> NaCl solution, the column was mixed twice by  
373 aspirating 950  $\mu\text{L}$  at the bottom of the wells and dispensing above the liquid surface. The transfers for serial dilutions

374 (columns 1 and 2) and to the 48 well FlowerPlate were executed right after mixing to minimize the effects of biomass  
375 sedimentation as much as possible. The FlowerPlate was sealed with a gas-permeable sealing foil (product number  
376 F-GP-10, m2p-labs GmbH, Baesweiler, Germany) and placed in the BioLector Pro device. The 1 h BioLector process  
377 for the acquisition of calibration data was programmed with shaking frequency profile of 1400, 1200, 1500, 1000 rpm  
378 while maintaining 30 °C chamber temperature and measuring backscatter with gain 3 in cycles of 3 minutes.  
379 The result file was parsed with a custom Python package and backscatter measurements made at 1400 rpm shaking  
380 frequency were extracted. A log(independent) asymmetric logistic calibration model was fitted as described in  
381 [Section 4.1.2](#). The linear calibration model for comparison purposes ([Figure 14](#)) was implemented with its intercept  
382 fixed to the background signal predicted by the asymmetric logistic model ( $\mu_{BS}(0 \frac{g}{L})$ ). It was fitted to a subset of  
383 calibration points approximately linearly spaced at 30 different biomass concentrations from 0.01 to 15 g/L.

### 384 3.1.6 Microbial growth experiment

385 Cultivations with *C. glutamicum* were performed in the automated microbioreactor platform ([Section 3.1.1](#)) under  
386 the described conditions. CGXII medium with 20 g/L glucose and without BHI was used as cultivation medium. To  
387 start the growth experiments, the liquid handler was used to transfer 20 µL of a WCB aliquot into the first column of  
388 FlowerPlate wells, which were pre-filled with 780 µL medium. These wells were run as a preculture. When precultures  
389 reached a backscatter readout of 15, which corresponds to a cell dry weight of approximately 10 g/L, the inoculation of  
390 the main culture wells was triggered. 780 µL medium were distributed into each main culture well (columns 2-8) and  
391 allowed to warm up for approximately 15 minutes. Preculture wells A01 and B01 were pooled and 20 µL culture broth  
392 was transferred to each main culture well, resulting in 800 µL final volume. The theoretical biomass concentration at  
393 the start of the main cultures is 0.25 g/L accordingly. This strategy was used to avoid a lag-phase with non-exponential  
394 growth.

395 Backscatter measurements of biomass concentration were acquired continuously, while main culture wells were  
396 harvested at predetermined time points to measure glucose concentrations in the supernatant. The time points were  
397 chosen between 0 and 15 hours after the inoculation of main cultures to cover all growth phases. For harvesting, the  
398 culture broth was transferred to a 1 mL deep-well plate by the liquid handler. The plate was centrifuged at  $3190 \times g$  at  
399 4 °C for 5 minutes and the supernatant was stored on a 1 mL deep well plate chilled to 4 °C. The glucose assay was  
400 performed after all samples were taken.

## 401 3.2 Computational methods

402 All analyses presented in this study were performed with recent versions of Python 3.7, PyMC3 ==3.11.2 [23],  
403 ArviZ >=0.9 [24], PyGMO >=2.13 [25], matplotlib >=3.1 [26], NumPy >=1.16 [27], pandas >=0.24 [28, 29],  
404 SciPy >=1.3 [30] and related packages from the Python ecosystem. For a full list of dependencies and exact versions  
405 see the accompanying GitHub repository and supporting information.

406 The two packages presented in this study, `calibr8` and `murefi`, may be installed via semantically versioned releases on  
407 PyPI. Source code, documentation and detailed release notes are available through their respective GitHub projects [31,  
408 32].

### 409 3.2.1 Asymmetric logistic function

410 The asymmetric, five-parameter logistic function (also known as *Richard's curve*) was previously shown to be a good  
411 model for many applications [33], but it is often defined in a parameterization ([Equation 11](#)) that is non-intuitive. Some  
412 parametrizations even introduce a sixth parameter to make the specification more intuitive, but this comes at the cost of  
413 structural non-identifiability [34, 35]. Furthermore, in the most commonly found parametrization ([Equation 11](#)), one  
414 parameter is constrained to be strictly positive. We also found that structural non-identifiability between the parameters  
415 makes it difficult to define an initial guess and bounds to reliably optimize a model based on this parametrization.

$$f(x) = L_L + \frac{L_U - L_L}{(1 + e^{-B(m-x)})^{1/v}} \quad (11)$$
$$L_L, L_U, B, m \in \mathbb{R}$$
$$v \in \mathbb{R}_{>0}$$

416 To make calibration model fitting more user friendly, we reparameterized the commonly used form such that all five  
417 parameters are intuitively interpretable and structurally independent [Figure 5](#). With our reparameterization ([Equation 12](#)),  
418 the 5-parameter asymmetric logistic function is parameterized by lower limit  $L_L \in \mathbb{R}$ , upper limit  $L_U \in \mathbb{R}$ , inflection

419 point x-coordinate  $I_x \in \mathbb{R}$ , slope at inflection point  $S \in \mathbb{R}$  and an asymmetry parameter  $c \in \mathbb{R}$ . At  $c = 0$ , the y-  
 420 coordinate of the inflection point lies centered between  $L_L$  and  $L_U$ .  $I_y$  moves closer to  $L_U$  when  $c > 0$  and accordingly  
 421 closer to  $L_L$  when  $c < 0$  (Figure 5, black and gray curves). An interactive version of Figure 5 can be found in a Jupyter  
 422 notebook in the `calibr8` GitHub repository ([31]).

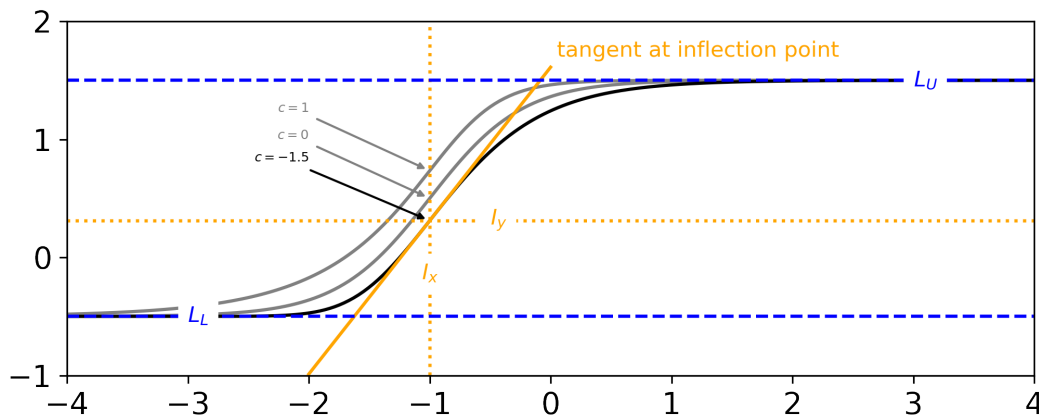

**Figure 5: Reparametrized Asymmetric Logistic Function**

When parametrized as shown in Equation 12, each of the 5 parameters can be manipulated without influencing the others. Note that, for example, the symmetry parameter  $c$  can be changed without affecting the x-coordinate of the inflection point ( $I_x$ ), or the slope  $S$  at the inflection point (gray vs. black).

423 For readability and computational efficiency, we used SymPy [36] to apply common subexpression elimination to  
 424 Equation 12 and our implementation respectively (Code 6). The step wise derivation from Equation 11 to Equation 12  
 425 is shown in Appendix A.1 and in a Jupyter notebook in the `calibr8` GitHub repository ([31]).

$$\begin{aligned}
 f(x) &= L_L + \frac{L_U - L_L}{(e^{s_2 \cdot (s_3 \cdot (I_x - x) + \frac{c}{s_2})} + 1)^{s_1}} \\
 s_0 &= e^c + 1 \\
 s_1 &= e^{-c} \\
 s_2 &= s_0^{(s_0 \cdot s_1)} \\
 s_3 &= \frac{S}{L_U - L_L}
 \end{aligned}
 \tag{12}$$

$$L_L, L_U, I_x, S, c \in \mathbb{R}$$

### 426 3.2.2 `calibr8` package for calibration models and modular likelihoods

427 With `calibr8` we present a lightweight Python package that specializes on the definition and modular implementation  
 428 of non-linear calibration models for calibration and modeling workflows.

429 The `calibr8` application programming interface (API) was designed such that all calibration models are implemented  
 430 as classes that inherit from `calibr8.CalibrationModel`, which implements properties and methods that are common  
 431 to all calibration models (Figure 6). The common interface simplifies working with calibration models in a data  
 432 analysis or modeling workflow. For example, the `CalibrationModel.objective` can be used to create objective  
 433 functions to optimize the model parameters. The objective relies on the `loglikelihood` method to compute the sum  
 434 of log-likelihoods from independent and dependent variables. It uses the `predict_dependent` method internally to  
 435 obtain the parameters of the probability distribution describing the dependent variables, conditioned on the independent  
 436 variable.

437 Through its inheritance-based design, the `calibr8.CalibrationModel` gives the domain expert full control over the  
 438 choice of trend functions and probability distributions. Conveniently, `calibr8` already implements functions such  
 439 as polynomial, logistic and `asymmetric_logistic`, as well as base classes for commonly found models. By  
 440 leveraging these base models, the implementation of a user-defined calibration model reduces to just a few lines of code

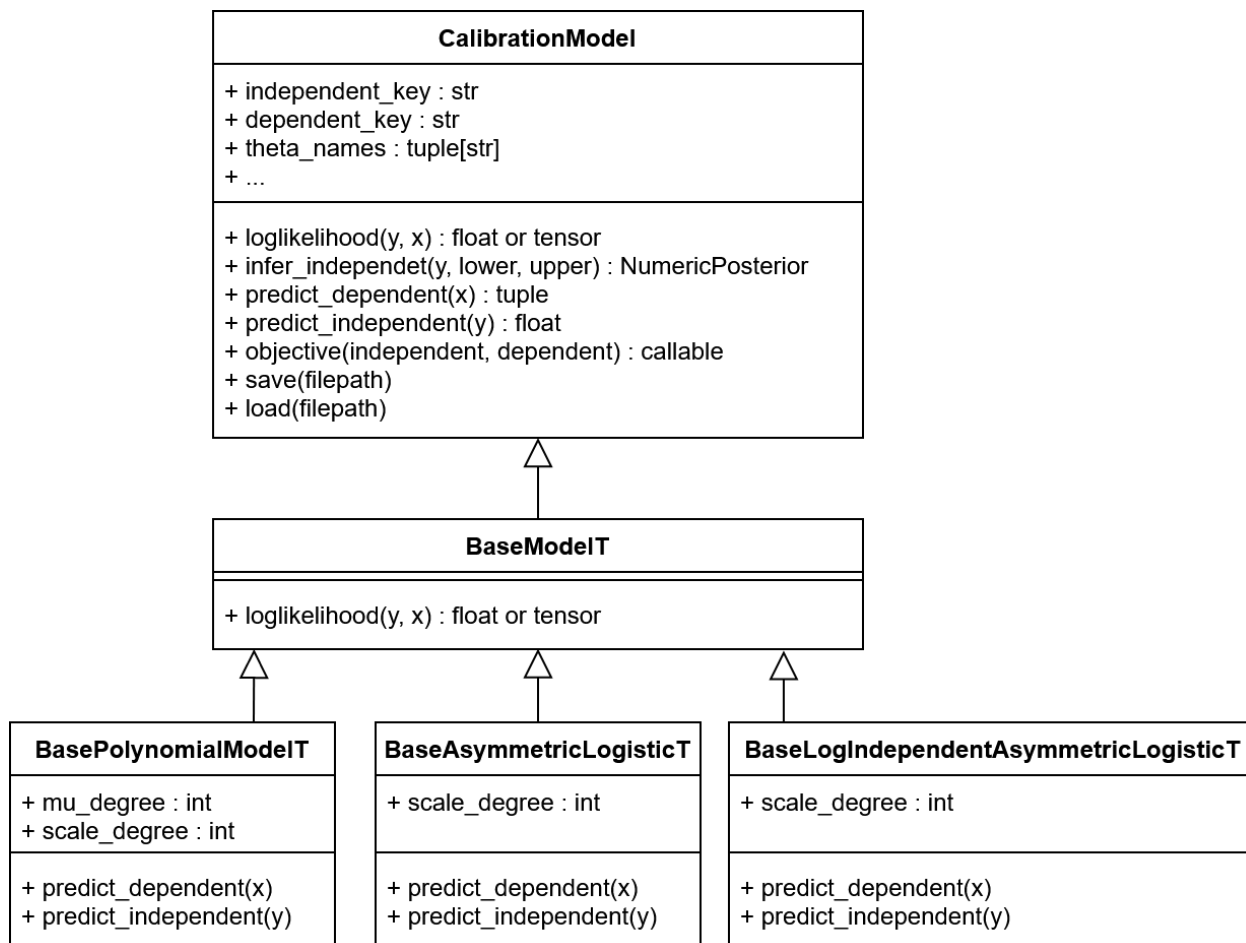

**Figure 6: calibr8 Class Diagram**

All `calibr8` models inherit from the same `CalibrationModel` class that defines attributes, properties and method signatures that are common to all calibration models. Some methods, like `save()` or `objective()` are implemented by `CalibrationModel` directly, whereas others are implemented by the inheriting classes. Specifically the `loglikelihood` and the `predict_*` methods depend on the choice of the domain expert. With a suite of `Base*T` classes, `calibr8` provides base classes for models based on Student- $t$  distributed observations. A domain expert may start from any of these levels to implement a custom calibration model for a specific application.

441 (Code 1 and Code 2).

442 The implementations depicted in Figure 6 are fully compatible with `aesara.Variable` inputs, resulting in  
 443 `TensorVariable` outputs. Aesara is a graph computation framework that auto-differentiates computation graphs  
 444 written in Python and compiles functions that evaluate with high performance [37]. This way, the `loglikelihood`  
 445 function of a `CalibrationModel` can be auto-differentiated and compiled, to facilitate efficient computation with  
 446 optimization or gradient-based MCMC sampling algorithms (Section 3.2.6). For more details about the implementation,  
 447 please refer to the documentation and code of the `calibr8` package ([31]).

448 **Convenience features** To facilitate modeling workflows, `calibr8` implements convenience functions for optimization  
 449 (`fit_scipy`, `fit_pygmo`) and creation of diagnostic plots (`calibr8.plot_model`) as shown in Figure 8 and Figure 9.  
 450 As explained in Section 2.4 the residual plot on the right of the resulting figure is instrumental to judge the quality of  
 451 the model fit.

452 Standard properties of the model, estimated parameters and calibration data can be saved to a JSON file via the  
 453 `CalibrationModel.save` method. The saved file includes additional information about the type of calibration model  
 454 and the `calibr8` version number (e.g. Code 9) to support good versioning and data provenance practices. When the  
 455 `CalibrationModel.load` method is called to instantiate a calibration model from a file, standard properties of the  
 456 new instance are set and the model type and `calibr8` version number are checked for compatibility.

### 457 3.2.3 Numerical inference

458 To numerically infer the posterior distribution of the independent variable, given one or more observations,  
459 `infer_independent` implements a multi-step procedure. The three outputs of this procedure are **A** a vector of  
460 posterior probability evaluations, densely resolved around the locations of high probability mass, and **B** the bounds of  
461 the equal-tailed, and highest-density intervals (ETI, HDI) corresponding to a user specified credible interval probability.  
462 In the first step, the likelihood function is integrated in the user specified interval [lower, upper] with  
463 `scipy.integrate.quad`. Second, we evaluate its cumulative density function (CDF) at 10 000 locations in  
464 [lower, upper] and determine locations closest to the ETI<sup>99.999 %</sup>. Next, we re-evaluate the CDF at 100 000 loca-  
465 tions in the ETI<sup>99.999 %</sup> to obtain it with sufficiently high resolution in the region of highest probability. Both ETI and  
466 HDI with the (very close to) user specified `ci_prob` are obtained from the high resolution CDF. Whereas the ETI is  
467 easily obtained by finding the CDF evaluations closest to the corresponding lower and upper probability levels, the HDI  
468 must be determined through optimization (Equation 13).

$$\text{HDI} = [a, a + d] = \underset{a, d}{\operatorname{argmin}} \begin{cases} \infty & \text{if } \text{CDF}(a + d) - \text{CDF}(a) < \text{ci\_prob} \\ d & \text{otherwise} \end{cases} \quad (13)$$

### 469 3.2.4 `murefi` package for building multi-replicate ODE models

470 Models of biochemical processes are traditionally set up to describe the temporal progression of an individual system,  
471 such as a reaction vessel. Experimental data, however, is commonly obtained from multiple reaction vessels in parallel,  
472 often run under different conditions to maximize information gain. This discrepancy between the prototypical model  
473 of the biological system and the heterogeneous experimental data to be fitted is typically resolved by replicating the  
474 model for all realizations of the biological system in the dataset. Along with the replication of the model, some model  
475 parameters may be kept *global*, while others can be *local* to a subset of the replicates, for example due to batch effects  
476 or different start conditions.

477 With a Python package we call `murefi` (multi-replicate fitting), we implemented data structures, classes and auxiliary  
478 functions that simplify the implementation of models for such heterogeneous time series datasets. It seamlessly  
479 integrates with `calibr8` to construct likelihood-based objective functions for optimization or Bayesian inference. To  
480 enable the application of efficient optimization or sampling algorithms, the use of automatic differentiation to obtain  
481 gradients of the likelihood w.r.t. input parameters is highly desirable. Various methods for automatic differentiation of  
482 ODE models are available, but their efficiency is closely connected to the implementation and size of the model [38]. In  
483 `murefi` we implemented support for `sunode` [39], a recently implemented Python wrapper around the SUNDIALS suite  
484 of nonlinear and differential/algebraic equation solvers [40]. When used in the context of a PyMC3 model, a process  
485 model created with `calibr8` and `murefi` can therefore be auto-differentiated, solved, optimized and MCMC-sampled  
486 with particularly high computational efficiency.

487 **Structure of time series data and models** To accommodate for the heterogeneous structure of time series experiments  
488 in biological applications, we implemented a data structure of three hierarchy levels. The `murefi.Timeseries` object  
489 represents the time and state vectors  $\vec{t}, \vec{y}$  of a single state variable or observation time series. To allow association of  
490 state and observed variables via `calibr8` calibration models, the `Timeseries` is initialized with `independent_key`  
491 and `dependent_key`. Multiple `Timeseries` are bundled to a `murefi.Replicate`, which represents either the  
492 observations obtained from one reaction vessel, or the predictions made by a process model. Consequently, the  
493 `murefi.Dataset` aggregates replicates of multiple reaction vessels, or the model predictions made for them (Figure 7  
494 center). To allow for a separation of data preprocessing and model fitting in both time and implementation, a  
495 `murefi.Dataset` can be saved as and loaded from a single HDF5 file [41, 42].

496 To describe a reaction system by a system of ordinary differential equations, a new class is implemented by subclassing  
497 the `murefi.BaseODEModel` convenience type. In the constructor of the class, the names and order of parameters and  
498 state variables are defined, whereas the differential equations are implemented in a `dydt` class method. An example is  
499 shown in Code 3 with the implementation of the Monod kinetics for microbial growth.

500 **Parameter mapping and objective function** In addition to a `murefi` model instance, a `murefi.Dataset` and  
501 calibration models, a `murefi.ParameterMapping` must be defined to facilitate the creation of an objective function.  
502 This mapping specifies whether parameters are local or global and the rules with which they are shared between  
503 replicates. The `ParameterMapping` may be represented as a table, assigning each element of replicate-wise parameter  
504 vectors to constants or names of parameters in a comprehensive parameter vector. In Figure 7, the parameter mapping is  
505 depicted by arrows mapping elements of a 3-element comprehensive parameter vector to 2-element parameter vector of  
506 the replicate-wise models. A table-representation of the parameter mapping used to fit the Monod model in Section 4.2



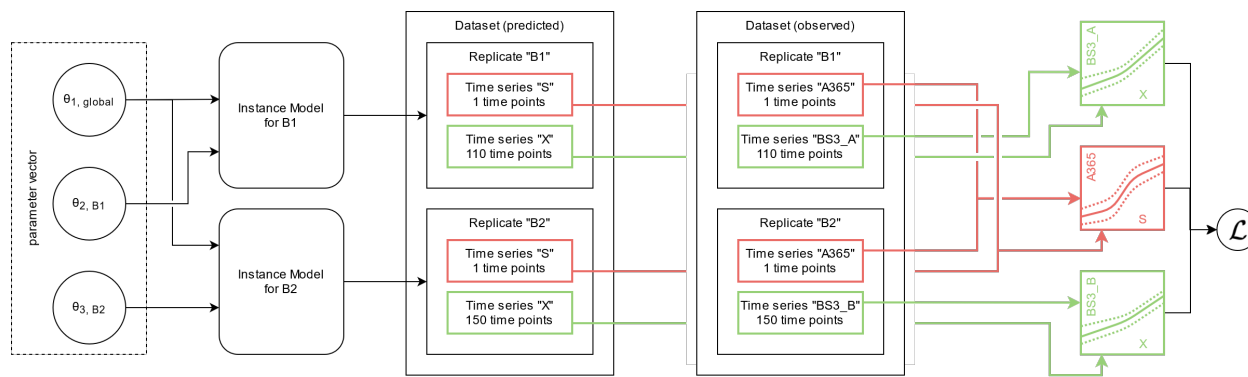

**Figure 7: Data structures and computation graph of *murefi* models**

Elements in a comprehensive parameter vector are mapped to replicate-wise model instances. In the depicted example, the model instances for both replicates "B1" and "B2" share  $\theta_{1, global}$  as the first element in their parameter vectors. The second model parameter  $\theta_2$  is local to the replicates, hence the full parameter vector (left) is comprised of three elements. Model predictions are made such that they resemble the structure of the observed data, having the same number of time points for each predicted time series. An objective function calculating the sum of log-likelihoods is created by associating predicted and observed time series via their respective calibration models. By associating the calibration models based on the dependent variable name, a calibration model may be re-used across multiple replicates, or kept local if, for example, the observations were obtained by different methods.

507 is shown in [Table 2](#).

508 Model predictions are made such that the time points of the predicted time series match those of the observed data  
 509 ([Figure 7](#), center). Based on the (in)dependent\_key, the predicted and observed Timeseries can be associated with  
 510 each other and passed to the corresponding CalibrationModel.loglikelihood method to calculate  $\mathcal{L}(\vec{\theta} | Y_{obs})$ .  
 511 Note that this procedure conveniently allows for calibration models to be shared by multiple replicates, as well as  
 512 making observations of one state variable with more than one analytical method.

513 An objective function performing the computation depicted in [Figure 7](#) can be created with a single call to a convenience  
 514 function. For compute-efficient optimization and specifically Bayesian parameter estimation, the elements in the  
 515 parameter vector can also be *Aesara* tensors, resulting in the creation of a symbolic computation graph. The computation  
 516 graph can not only be statically compiled, but also auto-differentiated, if all operations in the graph are also auto-  
 517 differentiable. This is already the case for standard *calibr8* calibration models and is also available for *murefi*-based  
 518 process models when the *sunode* [39] package is installed.

### 519 3.2.5 Optimization

520 In this work optimization algorithms are involved at multiple steps of the workflow. Unless otherwise noted we used  
 521 *scipy.optimize.minimize* with default settings to obtain the MLEs of calibration and process models. Our implementation  
 522 to compute HDIs ([Section 3.2.3](#)) uses *scipy.optimize.fmin*, as we found that the convergence with the underlying  
 523 Nelder-Mead simplex algorithm was more reliable than with gradient-based optimizers from *scipy.optimize.minimize*.  
 524 Initial guesses, as well as parameter bounds for maximum-likelihood optimization, were motivated from prior assump-  
 525 tions or exploratory plots of the data. Based on the intuitive parametrization of the asymmetric logistic ([Section 3.2.1](#))  
 526 we specified initial guesses for calibration models such that the model prediction from the guessed parameter vector was  
 527 at least in the same order of magnitude as the data. For maximum likelihood estimation of process model parameters,  
 528 the guessed parameters were motivated from prior assumptions. Likewise, we specified bounds to be realistic both  
 529 biologically and based on exploratory scatter plots of the data.

### 530 3.2.6 MCMC sampling

531 In contrast to optimization, MCMC sampling follows a very different paradigm. Whereas in maximum likelihood  
 532 estimation the likelihood function is iteratively evaluated to find its maximum, Bayesian inference aims to approximate  
 533 the posterior probability distribution according to [Equation 8](#).

534 Most *sampling algorithms* draw the posterior samples in the form of a Markov chain with a *equilibrium distribution* that  
 535 matches the posterior probability distribution. While early MCMC algorithms, such as Random-walk Metropolis [43]  
 536 are conceptually simple and easy to implement, they are computationally ineffective on problems with more than just a  
 537 handful of dimensions [44, 45]. Instead of implementing inefficient algorithms by hand, practitioners can rely on state

538 of the art libraries for Bayesian inference. These libraries apply automatic transformations, provide diagnostic tools and  
539 implement much more efficient sampling algorithms that often use gradients  $\frac{d\mathcal{L}}{d\theta}$  for higher computational efficiency.  
540 Probabilistic programming languages/libraries (PPL), such as PyMC3 [46], Pyro [47], Stan [48] or Tensorflow Probabil-  
541 ity [49] use automatic differentiation and typically implement at least one of the gradient-based sampling algorithms  
542 Hamiltonian Monte Carlo (HMC) or No-U-Turn Sampling (NUTS) [45]. PyMC3, the most popular Python-based PPL,  
543 implements both gradient-based (HMC, NUTS) as well as gradient-free algorithms, such as Differential Evolution  
544 MCMC (DE-MCMC) [50], DE-MCMC-Z [44] or elliptical slice sampling [51] in Python, allowing easy integration  
545 with custom data processing and modeling code. In this study, PyMC3 was used to sample posterior distributions with  
546 either DE-MCMC-Z (`pymc3.DEMetropolisZ`) or NUTS.

548 **MCMC sampling of the process model** Whereas in DE-MCMC, proposals are informed from a random pair  
549 of other chains in a "population", the DE-MCMC-Z version selects a pair of states from its own history, the "Z"-  
550 dimension. Compared to DE-MCMC, DE-MCMC-Z yields good results with less chains that can run independently.  
551 The `pymc3.DEMetropolisZ` sampler differs from the original DE-MCMC-Z in a tuning mechanism by which a  
552 `tune_drop_fraction` of by default 90% of the samples are discarded at the end of the tuning phase. This trick reliably  
553 cuts away unconverged "burn-in" history, leading to faster convergence.  
554 `pymc3.DEMetropolisZ` was applied to sample the process model in [Section 4.2.3](#). MCMC chains were initialized  
555 at the MAP to accelerate convergence of the DE-MCMC-Z sampler in the tuning phase. 50 000 tuning iterations per  
556 chain were followed by 500 000 iterations to draw posterior samples for further analysis. The `DEMetropolisZ` settings  
557 remained fixed at ( $\lambda = \frac{2.38}{\sqrt{2 \cdot d}}$  (default),  $\epsilon = 0.0001$ ) for the entire procedure.

558 The  $\hat{R}$  diagnostic from ArviZ [24] was used to check for convergence (all  $\hat{R} \approx 1$ , [Appendix A.3](#)).

### 559 3.2.7 Visualization techniques

560 Plots were prepared from Python with a combination of `matplotlib` [26], ArviZ and PyMC3. We used POV-Ray to  
561 produce [Figure 2](#) and [Figure 4](#) and <https://diagrams.net> for technical drawings. Probability densities were visualized  
562 with the `pymc3.gp.utils.plot_gp_dist` helper function that overlays many polygons corresponding to percentiles  
563 of a distribution, creating the colorful bands seen in [Figure 15](#) and others. Posterior predictive samples were obtained  
564 by randomly drawing observations from the calibration model, based on independent values sampled from the posterior  
565 distribution. If not stated otherwise, the densities plotted for MCMC prediction results were obtained from at least  
566 1000 posterior samples. The pair-plot of 2-dimensional kernel density estimates of posterior marginals ([Figure 17](#)) was  
567 prepared with ArivZ.

## 568 4 Results and discussion

### 569 4.1 Application: Implementing (non-)linear calibration models with `calibr8`

570 A common application of calibration models in life sciences are enzymatic assays, where the quantification of glucose  
571 is one out of many popular examples. In this section, data from a glucose assay is used as a demonstration case for  
572 building calibration models with `calibr8`. First, the linear range of the assay is described by the corresponding linear  
573 calibration model to then explore an extended concentration range by implementing a calibration model with logistic  
574 trend of the location parameter. We examine a second calibration example that is nonlinear in its nature, namely the  
575 backscatter/biomass relationship of measurements with a BioLector Pro device ([Section 3.1.1](#)), to then demonstrate  
576 how uncertainty estimates for biomass concentrations can be easily obtained with `calibr8`.

#### 577 4.1.1 Linear calibration model

578 To acquire data for the establishment of a calibration model, 96 glucose standards between 0.001 and 50 g/L were  
579 subjected to the glucose assay. A frequent approach to calibration modeling in life sciences is to identify the linear  
580 range of an assay and to discard measurements outside this range. From a previous adaptation of the glucose assay  
581 for automation with liquid handling robotics, the linear range was expected to be up to 2 g/L (Holger Morschett,  
582 personal communication, 2019). Since samples are diluted by a factor of 10 before the assay, 83 glucose standards with  
583 concentrations below 20 g/L remain for a linear calibration model.

584 As described in [Section 2.4](#), calibration models use a probability distribution to describe the relation between independent  
585 variable and measurement outcome, both subject to random noise. In this example, we chose a Student- $t$  distribution,  
586 thus the change of location parameter  $\mu$  over the independent variable determines the trend of the calibration model.  
587 `calibr8` provides a convenience class `BasePolynomialModelT` that was used to implement a glucose calibration

588 model with linear trend (Code 1). For the spread parameter  $\sigma$ , we also chose a linear function dependent on  $\mu$  to  
 589 account for increasing random noise in dependency of the absorbance readout of the assay. Both can easily be adapted  
 590 by changing the respective parameters  $\mu\_degree$  and  $scale\_degree$  passed to the constructor of the convenience  
 591 class. The degree of freedom  $\nu$  in a BasePolynomialModelT is estimated from the data as a constant.

**Code 1:** Implementation of glucose/absorbance calibration model using convenience type

```
592 1 class LinearGlucoseCalibrationModelV1(base.BasePolynomialModelT):
593 2     def __init__(self, *, independent_key:str='S', dependent_key:str='A365'):
594 3         super().__init__(
595 4             independent_key=independent_key,
596 5             dependent_key=dependent_key,
597 6             mu_degree=1,
598 7             scale_degree=1
599 8         )
```

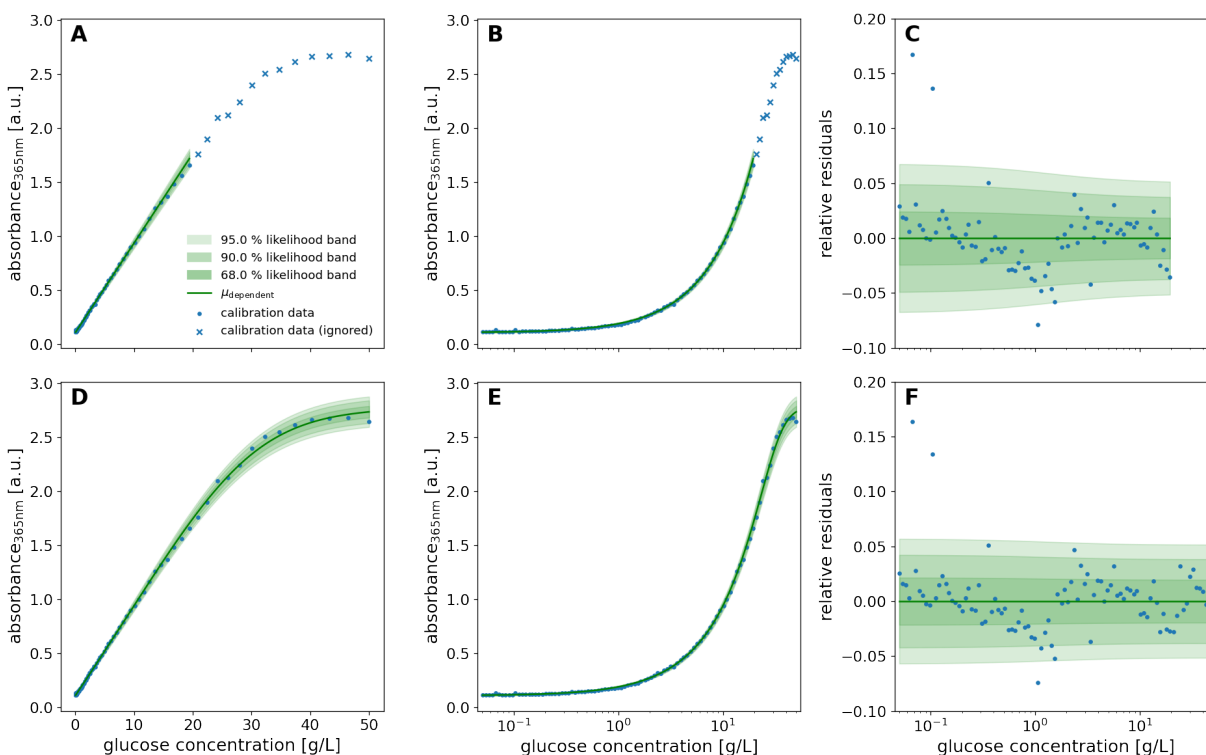

**Figure 8: Linear (top) and logistic (bottom) calibration model of glucose assay**

A calibration model comprising linear functions for both the location parameter  $\mu_{A365}$  and the scale parameter of a Student- $t$  distribution was fitted to calibration data of glucose standard concentrations (0.05-20 g/L) and absorbance readouts by maximum likelihood estimation (A-C). The calibration data used to fit the linear model is the 0.05-20 g/L subset of standards that were spaced evenly on a log-scale up to 50 g/L (B, E). Likewise, a calibration model with a 5-parameter asymmetric logistic function for the  $\mu$  parameter of the Student- $t$  distribution was fitted to the full 0.05-50 g/L calibration dataset (D-E). In both models, the scale parameter was modeled as a 1st-order polynomial function of  $\mu$  and the degree of freedom  $\nu$  as a constant. Standard concentrations were spaced evenly on a log-scale between 0.05 and 20 g/L (B, E). The extended range of calibration standard concentrations up to 50 g/L reveals a saturation kinetic of the glucose assay (A, D) and depending on the glucose concentration, the residuals (C, F) with respect to the modeled location parameter are scattered by approximately 5%. Modeling the scale parameter of the distribution as a 1st-order polynomial function of  $\mu$  describes the broadening of the distribution at higher concentrations (C).

600 The calibration model resulting from MLE of location and spread parameters was plotted with another calibr8  
 601 convenience function (Figure 8 A-C). The plot shows the calibration model and measurement data (Figure 8 A), the  
 602 same relation with a logarithmic x-axis (Figure 8 B) and the relative residuals of data and model predictions (Figure 8 C).  
 603 As it is often recommended for biological assays, the glucose concentrations of the dilution series were evenly spaced

604 on a logarithmic scale [52, 53], thus ensuring a higher accuracy of the model in the low-concentrated area (Figure 8 B).  
605 To evaluate the quality of the linear calibration model, the residuals of data and model prediction were analyzed  
606 (Figure 8 C). Overall, the residuals lie between  $\pm 5\%$  of the observed values, demonstrating the high precision of the  
607 data. For concentrations higher than 0.6 g/L, an s-shaped trend is observed in the residuals, meaning that data first lies  
608 below and then above the linear model prediction. This indicates a lack-of-fit as described in Section 2.4. However,  
609 the discrepancy might also be caused by errors in the serial dilution that was pipetted with the robotic liquid handler,  
610 resulting in deviations from the expected linear relation. Moreover, it can be seen that the relative spread of residuals  
611 is quite constant, meaning that the absolute deviation increases with higher concentrations (Figure 8 C). Although  
612 the linearly increasing scale parameter accounts for this rise of the underlying random noise, it can be seen that it is  
613 slightly overestimated by the model since all data points above 2 g/L lie within a 90 % probability interval.  
614 In comparison to simple linear regression, which is often evaluated by the coefficient of determination  $R^2$  alone, the  
615 demonstrated diagnostics allow to judge whether the choice of model is appropriate. In this case, a more sophisticated  
616 model for the spread of the Student- $t$  distribution could be chosen to reduce the lack-of-fit. Moreover, all data points  
617 lying above 20 g/L were not considered so far to allow for a linear model. In the following, we will therefore modify  
618 the existing calibration model to include a logistic function for the location parameter.

#### 619 4.1.2 Logistic calibration model

620 Although linear calibration models are useful in many cases, some relations in datasets are non-linear in their nature.  
621 Moreover, restricting analytical measurements to an approximately linear range instead of calibrating all concentrations  
622 of interest can be limiting. If the order of magnitude of sample concentrations is unknown, this leads to laborious dilution  
623 series or repetition of measurements to ensure that the linear range is met. In contrast, non-linear calibration models  
624 allow to describe complex relationships and, in case of biological assays, to reduce these time- and material-consuming  
625 workflows.

626 Many recommendations for experimental design in calibration can be found in literature (e.g. [52]). Having determined  
627 the range of interest for the calibration model, it should be exceeded in both directions if possible, thus ensuring  
628 that the relevant concentrations are well-covered. This way, all model parameters, including limits where applicable,  
629 can be identified from the observed data. Afterwards, the expected relationship between dependent and independent  
630 variable is to be considered. Since the glucose assay readout is based on absorbance in a plate reader (Section 3.1.4),  
631 which has a lower and upper detection limit, a saturation effect at high glucose concentrations is expected. In our  
632 demonstration example, glucose concentrations of up to 50 g/L were targeted to cover relevant concentration for  
633 cultivation (Section 4.2) and at the same time to exceed the linear range towards the upper detection limit.

634 Sigmoidal shapes in calibration data, e.g. often observed for immunoassays, can be well-described by logistic func-  
635 tions [33]. In the `calibr8` package, a generalized logistic function with 5 parameters is used in an interpretable form  
636 (Section 3.2.1). It was used to implement a calibration model where the location parameter  $\mu$  is described by a logistic  
637 function dependent on the glucose concentration. A respective base class `BaseAsymmetricLogisticT` is provided by  
638 `calibr8` (Appendix A.1). Using the whole glucose dataset up to 50 g/L, parameters of the new calibration model were  
639 estimated (Figure 8 D-F).

640 Overall, the logistic trend of the location parameter matches the extended calibration data well (Figure 8 D, E). Since the  
641 scale parameter of the Student- $t$  distribution is modeled as a linear function dependent on  $\mu$ , the width of the likelihood  
642 bands approaches a limit at high glucose concentrations (Figure 8 F). For concentrations greater than 3 g/L, no residuals  
643 lie outside of the 90 % probability interval, indicating that the distribution spread is overestimated as it was before.  
644 Importantly, a direct comparison between the two calibration models (Figure 8 C, F) reveals a high similarity in the  
645 reduced range ( $< 20$  g/L). This demonstrates how a non-linear model extends the range of concentrations available for  
646 measurement and modeling while improving the quality of the fit. For the glucose assay, truncating to a linear range  
647 thus becomes obsolete.

648 While non-linear models were so far shown to be useful to extend the usable concentration range of an assay,  
649 other applications do not allow to linearly approximate a subrange of measurements. Such an example is the on-  
650 line detection of biomass in growth experiments, where the non-invasive backscatter measurement of a BioLector  
651 Section 3.1.1 does not allow for dilution of the cell suspension during incubation. To model the distribution of  
652 backscatter observations as a function of the underlying biomass concentration, a structure similar to the glucose  
653 calibration model was chosen. In contrast, the location parameter  $\mu$  was modeled by a polynomial function of the  
654 logarithmic cell dry weight (CDW). The final CDW/backscatter calibration model was implemented using the  
655 `calibr8.BaseLogIndependentAsymmetricLogisticT` convenience class Code 2.

**Code 2:** Implementation of CDW/backscatter calibration model using convenience type

```
656 1 class BioLectorCDWBackscatterModelV1(calibr8.BaseLogIndependentAsymmetricLogisticT):  
657 2     def __init__(self, *, independent_key:str='X', dependent_key:str='BS'):  
658 3         super().__init__(  
659 4             independent_key=independent_key,
```

```
660 5         dependent_key=dependent_key ,  
661 6         scale_degree=1  
662 7     )
```

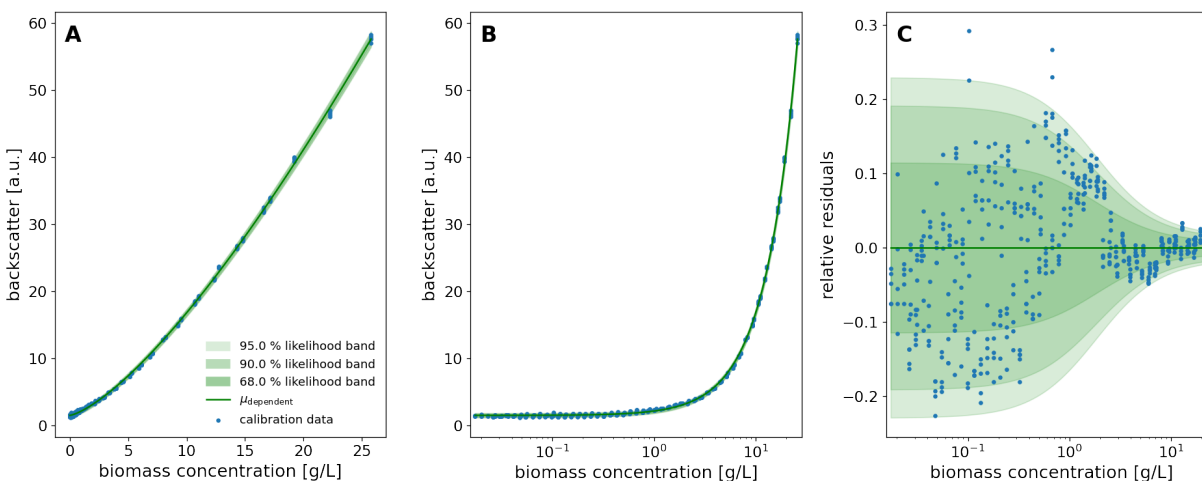

**Figure 9: Calibration model of biomass-dependent backscatter measurement**

Backscatter observations from two independent calibration experiments (1400 rpm, gain=3) on the same BioLector Pro were pooled. A non-linearity of the backscatter/CDW relationship is apparent already from the data itself (A). The evenly spaced calibration data (B) are well described with little lack-of-fit error (C). At low biomass concentrations the relative spread of the measurement responses starts at ca. 20 % and reduces to approximately 2 % at concentrations above 10 g/L.

663 Two independent experiments were conducted to obtain calibration data as described in Section 3.1.5. The model  
664 was fitted to pooled data using the `calibr8.fit_pygmo` convenience function. As shown in Figure 9, the model  
665 accurately describes the nonlinear correlation between biomass concentration and observed backscatter measurements  
666 in the BioLector Pro device (Figure 9 A, B). Non-linearity is particularly observed for biomass concentrations below  
667 10 g/L (Figure 9 A). Moreover, the residual plot (Figure 9 C) mainly shows a random distribution; solely residuals  
668 between 1 and 3 g/L indicate a lack-of-fit. To assess the potential influence, the resulting uncertainty in estimated  
669 biomass concentrations has to be considered, which will be further discussed in Section 4.1.3. Overall, the chosen  
670 logistic calibration model describes the calibration data well and is thus useful to transform backscatter measurements  
671 from the BioLector device into interpretable quantitative biomass curves.

672 In summary, this section illustrated how calibration models can be built conveniently with `calibr8` and showed that  
673 the asymmetric logistic function is suitable to describe many relationships in biotechnological measurement systems.  
674 Having demonstrated how concentration/readout relations can be described by different calibration models, a remaining  
675 question is how to apply those calibration models. An important use-case is to obtain an estimate of concentrations in  
676 unknown samples, where uncertainty quantification is a crucial step.

#### 677 4.1.3 Uncertainty quantification on independent variables

678 After establishing a calibration model, the practitioner can in most cases consider the parameters of the model as fixed.  
679 Characterization of measurement reproducibility is thereby externalized into the calibration procedure, where random  
680 noise is inherently described by the spread of a probability distribution. The calibration model can then be put into  
681 application for the quantification of the independent variable from new observations. As introduced before, not only a  
682 single value of the independent variable is desired, but also a measure of uncertainty about it.

683 Quantifying the uncertainty in the independent variable as a continuous probability density is not only intuitive to  
684 visually interpret (Section 2.4), but also flexible with respect to the question of interest. To quantify the uncertainty  
685 numerically, various kinds of credible intervals (Section 2.3) can be obtained. For example, one might estimate the  
686 equal-tailed interval in which the independent variable lies with 90 % probability, or alternatively the probability that it  
687 lies above a certain threshold.

688 In `calibr8`, the `CalibrationModel.infer_independent` method is used to perform the uncertainty quantification  
689 from one or more observations. Internally, it uses the `loglikelihood` method of the calibration model and numerically  
690 integrates the sum of log-likelihoods over a user-specified range of plausible independent variables (Section 3.2.3). The



691 resulting `calibr8.NumericPosterior` is equivalent to Equation 14, where the prior  $p(x)$  is specifying the plausible  
 692 range.

$$p(x | \vec{y}_{obs}) = \frac{\mathcal{L}(x | \vec{y}_{obs}) \cdot p(x)}{\int_{-\infty}^{\infty} \mathcal{L}(x | \vec{y}_{obs}) \cdot p(x) dx} = \frac{\mathcal{L}(x | \vec{y}_{obs}) \cdot p(x)}{\int_a^b \mathcal{L}(x | \vec{y}_{obs}) dx} \quad (14)$$

where  $p(x) = \text{Uniform}(a, b)$

693 For convenience, the `CalibrationModel.infer_independent` method automatically determines median and credible  
 694 interval (ETI and HDI) bounds. It determines vectors for the independent variable and the conditional probability  
 695 density that can be plotted without further processing.

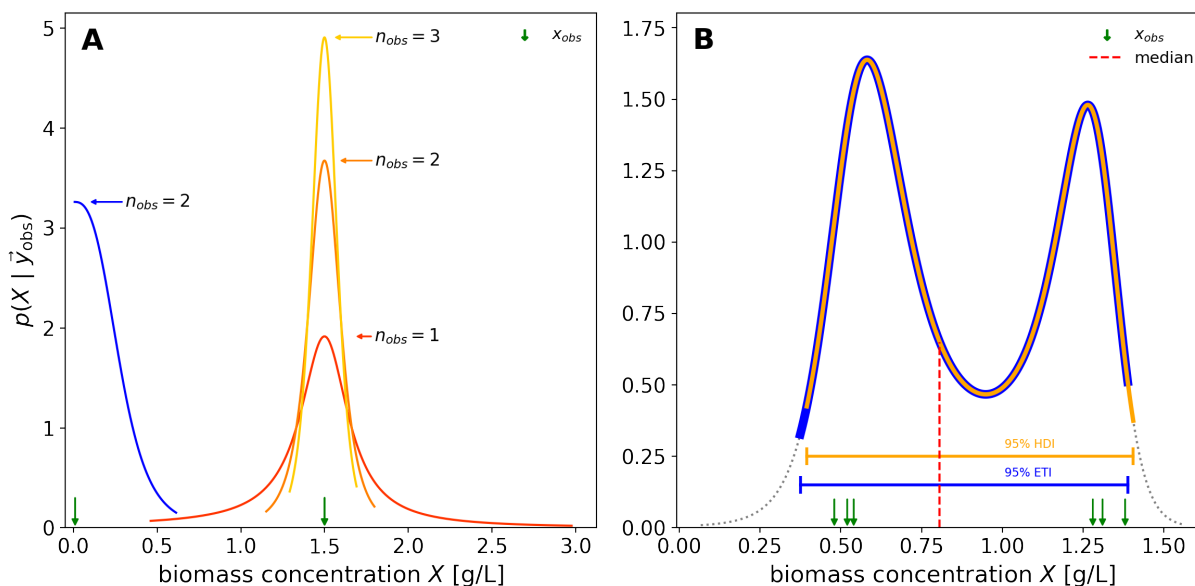

**Figure 10: Independent variable PDFs in various observation scenarios**

Posterior densities inferred from various numbers of observations corresponding to different biomass concentrations are shown (A). The ends of the drawn lines in A indicate the 95 % equal-tailed interval. Near biomass concentrations of 0, the posterior density is asymmetric (A, blue), indicating that very low concentrations can not be distinguished. As the number of observations grows, the probability mass is concentrated and the ETIs shrink (A, oranges). The choice of a Student- $t$  distribution model can lead to a multi-modality of the inferred posterior density when observations lie far apart (B). For asymmetric distributions, the median (dashed line) does not necessarily coincide with a mode and equal-tailed and highest-density intervals (ETI, HDI) can be different. Maximum likelihood estimates from individual observations, as obtained via `predict_independent` are shown as arrows. Note:  $\vec{y}_{obs}$  and the model's  $\nu$  parameter were chosen at extreme values for illustrative purposes.

696 In Figure 10, various inferences obtained with `infer_independent` are illustrated with a biomass calibration model.  
 697 For example, observations in the lower or upper saturation of the measurement system typically result in one-sided  
 698 probability densities, and repetitive observations result in a narrowing of the distribution (Figure 10, A).

699 When the calibration model assumes the possibility of outliers (Student- $t$  distributed measurement responses), the  
 700 observation of drastically different measurement responses can translate into a multi-modal posterior belief in the  
 701 independent variable. The intuition behind this multi-modality is that a subset of observations are "outliers" from the  
 702 perspective of the remaining observations and vice versa. In the example shown in Figure 10, the three observations  
 703 around 0.5 could be "outliers", or the ones around 1.3, but from the data alone both are equally likely. Hence the  
 704 posterior belief in the biomass concentration is bimodal.

705 The Bayesian, or likelihood-based perspective on uncertainty in the independent variable (Equation 14) allows for  
 706 quantification of uncertainty even with single observations, close to zero, or close to saturation limits of the measurement  
 707 system. Calibration models built with `calibr8` are easy to set up, visualize and diagnose and can thus be flexibly  
 708 integrated into existing data analysis workflows of various domains. Moreover, the set-up in a versatile, object-oriented  
 709 programming language such as Python allows to use `calibr8` in high-throughput, automated experiments where  
 710 hundreds of calibration models must be fitted. Next, we will build upon the presented biomass and glucose calibration

711 models and demonstrate how combining them with a bioprocess model enables to gain insight into the growth phenotype  
712 of a biotechnological model organism, *C. glutamicum*.

## 713 4.2 Application 2: Process modeling of bacterial growth

714 A real-world experimental procedure is often not a textbook example, but rather a heterogeneous dataset, *e.g.* comprising  
715 multiple measurement types or varying process conditions. We use the term *process model*, as introduced in [Section 2.5](#),  
716 to describe the complete underlying chemical or biological process, but not the experimental observations that are  
717 made of it. These input/output relations of the measurement system are explicitly described by calibration models. In  
718 this application example, we demonstrate how object-oriented `calibr8` calibration models from [Section 4.1](#) can be  
719 combined with an ODE bioprocess model to describe a heterogeneous dataset of bacterial growth curves.

720 The simplest experimental setup to obtain a bacterial growth curve is a so-called batch cultivation. Under laboratory  
721 conditions, such batch cultivations can be performed in a variety of cultivation systems such as shake flasks, bioreactors  
722 or microbioreactors. From a data science perspective, the cultivation systems differ mostly by how many independent  
723 cultivations are performed in parallel and by the kind and number of observations made per cultivation. In the domain  
724 of bioprocess development, a large number of cultivations must be conducted to find best-performing producer strains  
725 and media compositions. For these applications, microbioreactors offer an increased cultivation throughput combined  
726 with non-invasive *on-line* measurements of pH, dissolved oxygen tension (DO) and, in case of the BioLector, also  
727 biomass [54]. However, all three signals are obtained optically and must be calibrated against the true variable of  
728 interest ([Section 3.1.1](#), [Section 3.1.5](#)). Furthermore, confounding factors are known for all three measurement methods,  
729 mandating special rigor in the design and analysis of quantitative experiments. For example, the optode-based pH and  
730 DO measurements can be influenced by media components, or the backscatter signal by morphology changes.

731 To facilitate a simple application example, we grew *Corynebacterium glutamicum* in a BioLector Pro device ([Sec-  
732 tion 3.1.2](#)). This bacterium is a well-known industrially applied microorganism that exhibits textbook-like exponential  
733 growth kinetics when grown on carbon sources such as glucose [55]. A preculture was grown in the BioLector wells  
734 A01 and B01 and used to automatically inoculate 28 main culture wells (A02 through F08). We thus avoided a lag  
735 phase of adaptation at the beginning of the growth curve, which greatly simplifies the process model ([Section 3.1.2](#)). As  
736 we will see later on, the pipetting error of the robotic liquid handler at the small inoculation volume must be considered  
737 when setting up the process model, highlighting the need to adapt the data analysis to the peculiarities of the experiment.  
738 Before going into the details of the process model for this application example, we would like to emphasize that the  
739 same modeling techniques can be applied to other domain specific examples.

### 740 4.2.1 Building an ODE process model for bacterial growth experiments

741 The simplest model for microbial growth is the Monod kinetics differential equation model of substrate-limited  
742 exponential growth [56]. Similar to how the famous Michaelis-Menten kinetics describe enzymatic reaction rates, the  
743 Monod kinetics model the specific growth rate as a function of substrate concentration. Under the assumptions of  
744 homogeneous mixing, unlimited nutrient supply and constant ambient conditions, the Monod model can be applied  
745 to batch cultivations of bacterial, fungal, plant or cell cultures that grow with a maximum growth rate  $\mu_{\max}$  until a  
746 substrate, typically a carbon source, is depleted.

747 The Monod model ([Equation 15](#)) has five parameters including the initial conditions for substrate concentration  $S_0$   
748 and biomass concentration  $X_0$ . The maximum growth rate  $\mu_{\max}$  specifies the specific exponential growth rate that the  
749 organism can achieve under the modeled conditions. The actual specific growth rate  $\mu(t)$  is modeled as a function of  
750  $\mu_{\max}$ , the current substrate concentration  $S$  and a parameter  $K_S$  that corresponds to the substrate concentration at which  
751  $\mu(t) = \frac{\mu_{\max}}{2}$ . The last parameter  $Y_{XS}$ , called biomass yield, describes the amount of substrate consumed per unit of  
752 formed biomass.

$$\begin{aligned} \frac{dX}{dt} &= \mu_{\max} \cdot X \cdot \frac{S}{K_S + S} \\ \frac{dS}{dt} &= -Y_{XS} \cdot \frac{dX}{dt} \end{aligned} \quad (15)$$

$$S, X, \mu_{\max}, K_S, Y_{XS} \in \mathcal{R}_{>0}$$

753 The experiment to be modeled in this application example was devised such that Monod-like growth behavior of  
754 *C. glutamicum* wild-type could be expected ([Section 3.1.2](#)). We grew 28 parallel batch cultures that were sampled  
755 to measure glucose concentrations in addition to the high resolution backscatter time series. The resulting dataset  
756 comprises 28 *replicates*, each with backscatter time series of varying length and a time series of length 1 for the glucose  
757 absorbance readout. Building upon our Python package `muref.i` for flexible **multi-replicate fitting**, we loaded the raw

758 observations into a `murefi.Dataset` object (Section 3.2.4). The package was designed to simplify the definition and  
 759 parameter estimation of process models that describe all replicates in a dataset simultaneously.  
 760 To build such elaborate process models with `murefi`, the user must specify the process model corresponding to a  
 761 single replicate, as well as a set of rules that describe how parameters of this model are shared across replicates.  
 762 The Monod kinetics in this application example were implemented in just a few lines of code by subclassing from  
 763 `murefi.BaseODEModel` (Code 3).

**Code 3:** Implementation of Monod ODE model using `murefi.BaseODEModel` convenience type

```

764 1 class MonodModel(BaseODEModel):
765 2     def __init__(self):
766 3         super().__init__(
767 4             theta_names=('S0', 'X0', 'mu_max', 'K_S', 'Y_XS'),
768 5             independent_keys=['S', 'X'])
769 6
770 7
771 8     def dydt(self, y, t, theta):
772 9         S, X = y
773 10        mu_max, K_S, Y_XS = theta
774 11        dXdt = mu_max * S * X / (K_S + S)
775 12        dSdt = -1 / Y_XS * dXdt
776 13
777 14        return [
778 15            dSdt,
779 16            dXdt,
780 17        ]
    
```

781 For heterogeneous datasets, the rules for sharing process model parameters across replicates can be complex and hard  
 782 to implement and most modeling workflows require the practitioner to often change the parametrization. In `murefi`,  
 783 the `ParameterMapping` class supports the modeler by specializing in the tedious translation of parameter sharing rules  
 784 into a function (`.repmap(...)`) that takes a single parameter vector and transforms it into replicate-specific parameter  
 785 vectors. At the same time, it provides mechanisms for specifying fixed parameters, initial guesses and bounds on the  
 786 parameters. Reading a spread sheet with parameters into Python is an easy way of initializing the `ParameterMapping`  
 787 (Figure 11).

|     | S0 | X0     | mu_max | K_S  | Y_XS |
|-----|----|--------|--------|------|------|
| rid |    |        |        |      |      |
| A02 | S0 | X0_A02 | mu_max | 0.02 | Y_XS |
| A03 | S0 | X0_A03 | mu_max | 0.02 | Y_XS |
| A04 | S0 | X0_A04 | mu_max | 0.02 | Y_XS |
| A05 | S0 | X0_A05 | mu_max | 0.02 | Y_XS |
| A06 | S0 | X0_A06 | mu_max | 0.02 | Y_XS |

**Figure 11: Tabular DataFrame representation of a parameter mapping**

With columns corresponding to the parameter names of a naive Monod process model, the parametrization of each replicate, identified by a *replicate ID* (*rid*) is specified in a tabular format. Parameter identifiers that appear multiple times (e.g. S0) correspond to a parameter shared across replicates. Accordingly, replicate-local parameters names simply do not appear multiple times (e.g. X0\_A06). Numeric entries are interpreted as fixed values and will be left out of parameter estimation. Columns do not need to be homogeneously fixed/shared/local, but parameters can only be shared within the same column.

788 Unique names specify that a parameter is only estimated from the indicated replicate (e.g. X0\_A02) while shared names  
 789 correspond to global parameters (e.g. S0). For the application example at hand, a parameter mapping was defined such  
 790 that the parameter  $X_0$  is local to each replicate while  $S_0$ ,  $\mu_{max}$  and  $Y_{XS}$  are shared across all replicates. For the Monod  
 791 substrate affinity constant  $K_S$ , literature reports values of approximately 0.00005-0.1 g/L for *Escherichia coli* [57]),  
 792 while no data is available for *C. glutamicum*. Because it is practically non-identifiable at the resolution of our dataset,  
 793  $K_S$  was fixed to an arbitrary, but numerically harmless value of 0.02 g/L. In Figure 11, this is expressed by the numerical  
 794 column entries.  
 795 A likelihood function for parameter estimation was created using the `murefi.objectives.for_dataset` convenience

796 function (Code 4). The objective is independent of the parameter estimation paradigm and was applied for optimization  
797 via MLE (Section 4.2.2) and sampling by MCMC (Section 4.2.3) in the scope of this work.

#### 798 4.2.2 Estimating ODE process model parameters by maximum likelihood

799 First, we determined maximum likelihood estimates of the process model parameters through optimization. In few  
800 lines of code, the calibration models from Section 4.1 and dataset are loaded (Code 4, ll. 2-4), the process model is  
801 instantiated (Code 4, l. 1) and the ParameterMapping is specified with bounds and guesses (Code 4, ll. 7-21). The  
802 objective (Code 4, ll. 22-27) can directly be used for an optimization algorithm (Code 4, ll. 28-32), in this case one  
803 from the popular Python library `scipy`. A table with MLE parameters can be found in Appendix A.3.

##### Code 4: MLE of process model parameters

```
804 1 model = MonodModel()
805 2 dataset = murefi.load_dataset("cultivation_dataset.h5")
806 3 cm_biomass = BioLectorCDWBackscatterModelV1.load("biomass_cm_logistic.json")
807 4 cm_glucose = LogisticGlucoseCalibrationModelV1.load("glucose_cm_logistic.json")
808 5 df_mapping = pandas.read_excel("parameter_mapping.xlsx", index_col='rid')
809 6
810 7 theta_mapping = murefi.ParameterMapping(
811 8     df_mapping,
812 9     bounds={
813 10         "S0": (15, 20),
814 11         "X0": (0.01, 0.4),
815 12         "mu_max": (0.4, 0.5),
816 13         "Y_XS": (0.3, 1)
817 14     },
818 15     guesses={
819 16         "S0": 17,
820 17         "X0": 0.01,
821 18         "mu_max": 0.4,
822 19         "Y_XS": 0.5
823 20     }
824 21 )
825 22 objective = murefi.objectives.for_dataset(
826 23     dataset=dataset,
827 24     model=model,
828 25     parameter_mapping=theta_mapping,
829 26     calibration_models=[cm_glucose, cm_biomass]
830 27 )
831 28 mle_result = scipy.optimize.minimize(
832 29     objective,
833 30     x0=theta_mapping.guesses,
834 31     bounds=theta_mapping.bounds
835 32 )
```

836 Figure 12 shows the observations alone (A) and combined with MLE results (B) for glucose (absorbance) and biomass  
837 (backscatter). The replicates were sampled at different times to measure glucose concentrations; the end of a time series  
838 is indicated by an arrow and the replicate name (Figure 12, A). Overall, the backscatter time series show a very high  
839 reproducibility, which demonstrates the effect of pooling precultures before inoculation (Section 3.1.2). The model  
840 describes the observations so accurately that they can only be distinguished in the inset plot (Figure 12, B). Here, a small  
841 difference between different replicates can be observed, which is caused by different initial biomass concentrations due  
842 to inevitable pipetting errors in the automated inoculation of the main cultures. It becomes evident that replicate-wise  
843  $X_0$  parameters were necessary to account for this effect. The different initial biomasses are also visible from the spread  
844 of data points at the beginning of the growth curve (Figure 12, B). For the biomass, the only period of systematic  
845 deviation between model prediction and observations is at the time of entry into the stationary phase, the phase where  
846 substrate is depleted and growth stops. Here, the biomass signal overshoots while the Monod kinetics predict a rapid  
847 change to a constant signal. This effect in the growth curve of *C. glutamicum* is also known from other experiments  
848 with the BioLector [58] and cannot be accounted for by the otherwise useful textbook process model.  
849 The glucose data shows more deviation, but follows the expected textbook behaviour of exponential decay (Figure 12, B).  
850 Interestingly, the predictions for glucose concentrations at the end of cultivation lie slightly above  $0 \frac{g}{L}$ , showing that the  
851 corresponding calibration model is not describing this range of concentrations well. The deviation could be caused  
852 by other components in the used cultivation medium that distort the measurement compared to calibration with fresh

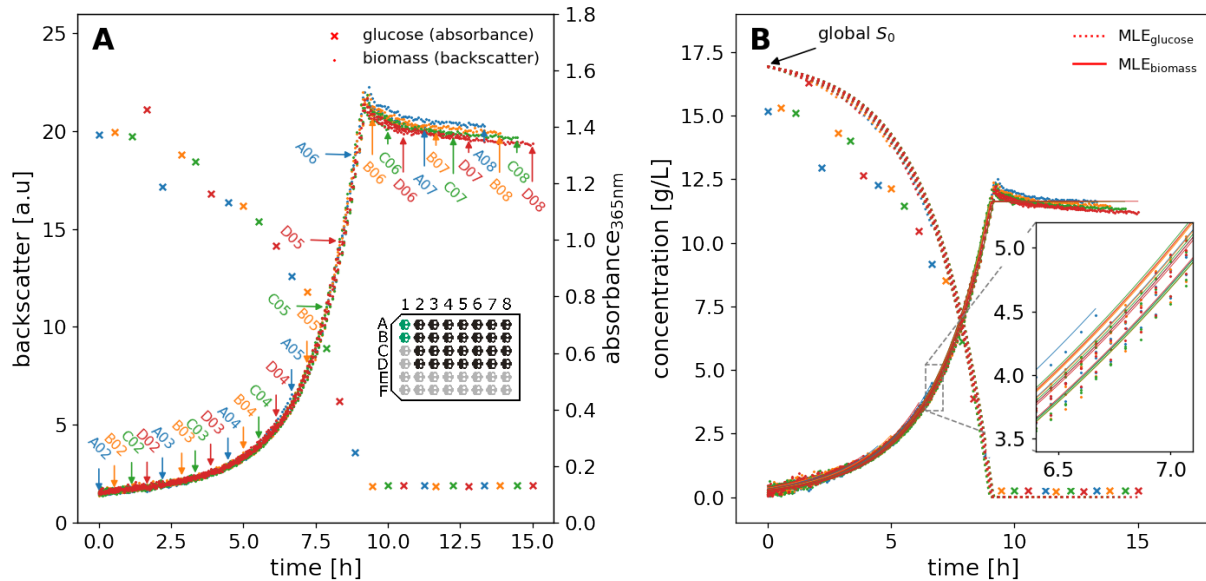

**Figure 12: Measurements and maximum likelihood estimate of *C. glutamicum* growth Monod model**

Original measurement responses of *on-line* biomass (backscatter) and *at-line* endpoint glucose assay measurements (absorbance) are shown in (A). Glucose measurements were obtained by sacrificing culture wells, hence each backscatter time series terminates at the time of glucose assay observations. The time and well ID of sacrifices are marked by arrows, colored by row in the cultivation FlowerPlate. The inset plot shows a typical FlowerPlate layout. The preculture wells (data not shown) are highlighted in green, main cultures in black.

In B, the observations and MLE predictions of the ODE process model are shown in SI units. Observations were transformed from original units using the `predict_independent` method of the respective calibration model. Whereas all curves start at the same global initial substrate concentration  $S_0$ , each well has individual initial biomass concentrations, resulting in the time shifts visible in the zoomed-in inset plot. Biomass observations in the inset plot (●) correspond to the median posterior inferred from each backscatter observation individually.

853 medium as diluent. However, this was not further investigated since the substrate data has little influence on the  
854 parameter estimation compared to the high-resolution backscatter measurements.

855 From a first inspection of MLE results, we can see that the simple Monod process model describes the high-resolution  
856 data very well. For more insight, we will take a look at the parameter estimation, correlations and systematic deviations  
857 using a Bayesian approach.

#### 858 4.2.3 Hierarchical Bayesian ODE models with `calibr8` and `murefi`

859 The results presented in the previous chapter show that the Monod model, when combined with non-linear calibration  
860 models for the observations, can describe the observed biological process with high accuracy. However, the precision of  
861 the parameter set obtained by the maximum likelihood method is still unknown. Particularly, when decisions are made  
862 from model-based inferences and predictions, the uncertainty about these variables is a key factor.

863 The combination of (forward) sensitivity analysis with Gaussian error propagation could be applied to learn about  
864 the precision of the maximum likelihood estimate. Instead of maximum likelihood optimization of a parameter set,  
865 Bayes' rule can be used to infer a posterior probability distribution of parameters. In comparison to the maximum  
866 likelihood method, the Bayesian approach allows to incorporate prior knowledge and inherently quantifies uncertainty  
867 and parameter correlations. Bayesian posteriors can in some (rare) cases be obtained analytically, or numerically as  
868 shown in Section 4.1.3. However, in most practical applications Markov chain Monte Carlo (MCMC) algorithms are  
869 applied. MCMC offers convergence guarantees as the number of iterations approaches infinity and can give satisfactory  
870 results with competitive computational performance when modern algorithms are used.

871 To build a Bayesian process model, one must explicitly state prior beliefs in the model parameters in the form of  
872 probability distributions. For our hierarchical Monod model application example, we must specify prior beliefs  
873 in the ODE parameters  $\mu_{\max}$ ,  $Y_{XS}$  and initial conditions  $S_0$  and  $X_{0,\text{well}}$ . Prior distributions for these parameters  
874 were specified to reflect biologically reasonable, but uninformative assumptions about the experiment Equation 16.  
875 The initial substrate concentration  $S_0$  was expected at approximately  $20 \frac{g}{L}$  with a conservative 10 % relative error.



876 For *Corynebacterium glutamicum* wild-type, our priors for biomass yields with  $\text{HDI}_{Y_{\text{XS}}}^{95\%} = [0.5, 0.7] \frac{g_{\text{CDW}}}{g_{\text{glucose}}}$  and  
 877 for maximum growth rates with  $\text{HDI}_{\mu_{\text{max}}}^{95\%} = [0.2, 0.6] h^{-1}$  are uninformative and based on literature [59]. Our  
 878 process model describes initial biomass concentrations on a per-well basis (Section 4.2.1), but can still infer the  
 879 mean initial biomass concentration  $X_{0,\mu}$  as a *hyperprior* by modeling well-specific offsets w.r.t. the group mean as  
 880  $X_{0,\text{well}} = X_{0,\mu} \cdot F_{\text{offset,well}}$ . Through  $X_{0,\mu}$  the priors for all initial biomass concentrations  $\vec{X}_0$  are parametrized by a  
 881 common parameter, allowing each individual  $X_{0,\text{well}}$  to vary while concentrating around their common group mean.  
 882 For more intuition and details about Bayesian hierarchical modeling in particular, we refer to [60].  
 883 The experiment was programmed to inoculate main cultures to approximately 0.25 g/L (Section 3.1.2), therefore the  
 884 prior for  $X_{0,\mu}$  was centered at 0.25 g/L with a 10 % relative error. Our prior belief in the well-specific relative offset  
 885  $F_{\text{offset,well}}$  was also modeled by a Lognormal distribution with mean 0, corresponding to the expectation that the offset  
 886 is centered around 1 in the transformed space. A standard deviation of 20 % was chosen to account for random and  
 887 systematic inaccuracy of the automated liquid handler at the low pipetting volume of 20  $\mu\text{L}$  [58].

$$X_{0,\mu} \sim \text{Lognormal}(\mu = \log(0.25), \sigma = 0.1)$$

$$F_{\text{offset}} \sim \text{Lognormal}(\mu = 0, \sigma = 0.2)$$

$$\vec{X}_0 \sim X_{0,\mu} \cdot \vec{F}_{\text{offset}}$$

$$S_0 \sim \text{Lognormal}(\mu = \log(20), \sigma = 0.1)$$

$$Y_{\text{XS}} \sim \text{Beta}(\mu = 0.6, \sigma = 0.05)$$

$$\mu_{\text{max}} \sim \text{Beta}(\mu = 0.4, \sigma = 0.1)$$

(16)

$$Y_{\text{pred,well}} \sim \phi_{\text{process model}}(S_0, X_{0,\text{well}}, \mu_{\text{max}}, Y_{\text{XS}})$$

$$\mathcal{L}(\theta_{\text{pm}} | Y_{\text{obs}}) = p(Y_{\text{obs}} | \theta_{\text{em}}(Y_{\text{pred}}))$$

888 When modeling with `calibr8` and `murefi`, this specification of prior beliefs is the only overhead compared to the  
 889 MLE method. The API of both packages was designed to be fully compatible with the probabilistic programming  
 890 library `PyMC3`, such that `calibr8` and `murefi` models can become fully Bayesian with little programming effort.  
 891 Concretely, the objective function created by `murefi` accepts Aesara tensors (e.g. `PyMC3` random variables) as  
 892 inputs, resulting in a symbolic `TensorVariable` likelihood instead of a numeric one. The `PyMC3` model for the  
 893 hierarchical ODE process model in our application example builds upon the previously established objective  
 894 function (Code 4, l. 22). The model code (Code 5) resembles the mathematical notation of the same model shown in  
 895 Equation 16.

**Code 5:** Specification of complete process model in `PyMC3`

```

896 1 with pymc3.Model() as pmodel:
897 2     # Specify a hyperprior on the initial biomass group mean:
898 3     # + centered on the planned inoculation density (0.25 g/L) in main cultures
899 4     # + with a 10 % standard deviation to account for pipetting errors
900 5     X0_mu = pymc3.Lognormal('X0_mu', mu=np.log(0.25), sd=0.10)
901 6
902 7     # Model the relative offset of initial biomass between each well and
903 8     # the group mean with a relative pipetting error of 20 %
904 9     F_offset = pymc3.Lognormal('F_offset', mu=0, sd=0.20, shape=(N_wells,))
905 10
906 11     # Thereby, the initial biomass in each well is the product
907 12     # of group mean and relative pipetting error:
908 13     X0 = pymc3.Deterministic('X0', X0_mu * F_offset)
909 14
910 15     # Combine the priors into a dictionary
911 16     theta = {
912 17         'S0': pymc3.Lognormal('S0', mu=np.log(20), sigma=0.10),
913 18         'Y_XS': pymc3.Beta('Y_XS', mu=0.6, sd=0.05),
914 19         'mu_max': pymc3.Beta('mu_max', mu=0.4, sd=0.1),
915 20         # unpack the vector of initial biomasses into individual scalars
916 21         **{

```

```
917 22         f'X0_{well}': X0[w]
918 23         for w, well in enumerate(wells)
919 24     }
920 25 }
921 26 # Re-use the objective function from the MLE model code
922 27 L = objective(theta)
```

923 After the PyMC3 process model was defined, its parameters were estimated by MCMC as described in [Section 3.2.6](#).  
924 Two-dimensional marginals of the posterior samples obtained from MCMC sampling are shown in [Figure 13](#) for two  
925 replicates and in [Figure 17](#) for the whole dataset.

926 The pair plot visualization of the posterior reveals that some model parameters are strongly correlated with each other.  
927 Among those strong correlations are the pair of initial substrate concentration  $S_0$  and biomass yield  $Y_{XS}$ . Interestingly,  
928 even in the very narrow HDIs of  $X_{0,\text{well}}$  and  $\mu_{\text{max}}$ , correlations were found, which is particularly clear for replicate  
929 D06. An interpretation is that when the initial biomass concentration is estimated at a smaller value, the maximum  
930 growth rate of cells must be higher to reach the same biomass level. The correlation is thus a natural consequence of the  
931 underlying process. Similarly, a lower initial substrate concentration results in a higher yield.

932 From a modeling point of view, the plot reveals how identifiable the model parameters are from the data. Furthermore,  
933 strong correlations, as observed for  $Y_{XS}$  and  $S_0$ , can be problematic for some optimization or MCMC sampling  
934 algorithms. In this case, the applied algorithm DE-Metropolis-Z [44] proved beneficial to sample the 32-dimensional  
935 parameter space with highly correlated parameters ([Figure 13](#), top right). Interestingly, the strength of the correlation  
936 depends on the amount of data that was available for a particular replicate ([Figure 17](#)). The more data available,  
937 the stronger the correlation between  $X_0$  and  $\mu_{\text{max}}$ ; this can also be observed for wells D04 and D06. The parameter  
938 estimates by MCMC are also tabulated in [Appendix A.3](#).

939 In the lower part of [Figure 13](#), the observations as well as model predictions with parameters sampled from the  
940 posterior are shown. Each line in the density plot corresponds to one set of parameters sampled with the MCMC  
941 algorithm. The small width of the density bands express how well the parameters could be estimated from the data,  
942 which is in accordance to the pair plot above. The violins around the substrate data visualize the uncertainty of glucose  
943 concentration inferred with the calibration model alone, instead of using the process model with all evidence. The violin  
944 is wider than the posterior band from the process model accordingly. Similar to the the MLE results, it becomes obvious  
945 that the Monod model estimate is well-suited to describe the biological dataset. With `calibr8` and `murefi`, building  
946 and sampling the Bayesian model needs a similar effort as MLE and the user can focus on structural requirements rather  
947 than cumbersome implementation. To assess the benefits of the Bayesian model in more detail, the role of different  
948 calibration models, the residuals and the hierarchical parameter  $X_0$  are investigated in more detail in the next section.

#### 949 4.2.4 Process and model insight through Bayesian uncertainty quantification

950 From the process model fit and the uncertainty estimates in particular, conclusions about the choice of model and the  
951 underlying biological process can be drawn. First, to emphasize that the elaborate non-linear calibration model was  
952 required, we compare the process model fits obtained with a non-linear versus a linear calibration model. The more  
953 traditional linear biomass/backscatter correlation was fitted to calibration data as described in [Section 3.1.5](#) and used to  
954 fit the D06 replicate from our dataset. For comparison, the asymmetric logistic calibration model from [Section 4.1.1](#)  
955 was used to estimate parameters of the same process model and data.

956 On a first glance, the fit of the Monod process model using the linear biomass calibration model looks like a good  
957 description of the data ([Figure 14 A](#)), but does not hold up to closer inspection. The residual plots (B, C) reveal that  
958 using the linear calibration model results in systematically larger residuals of the process model, compared to using the  
959 logistic calibration model. A thorough inspection of the linear calibration model itself (D) also reveals that it already  
960 has a lack-of-fit of the location parameter (green line), similar to the depiction in [Figure 3](#). We would like to point  
961 out that also the maximum growth rate estimated from a process model with linear biomass/backscatter calibration  
962 ( $\text{HDI}_{\mu_{\text{max}}}^{90\%} = [0.479, 0.531]$ ) is systematically overestimated compared to the one with the logistic model ( $\text{HDI}_{\mu_{\text{max}}}^{90\%} =$   
963  $[0.415, 0.423]$ ). Regarding the choice of calibration model for the biomass/backscatter relationship, we conclude that  
964 the linear model should no longer be used, as it results in biased parameter estimates.

965 Having chosen a suitable calibration model for the variables, the choice of the Monod model itself can be investigated.  
966 [Figure 15](#) shows the high-resolution biomass data and predictions from MCMC on a logarithmic y-scale ([Figure 15, A](#))  
967 as well as the residuals in backscatter units ([Figure 15, B](#)). In the left subplot, the data was transformed to biomass  
968 concentrations with the logistic biomass calibration model. The orange intervals represent the  $\text{HDI}_{\text{biomass}}^{90\%}$  inferred from  
969 a single observation using only the calibration model. In contrast, the blue density represents the posterior of the process  
970 model, which contains all observations. Naturally, the posterior from all evidence, combined through the process model,  
971 is much narrower than the posterior from any single observation. The plot reveals that the exponential growth assumed

Bayesian calibration, process modeling and uncertainty quantification in biotechnology

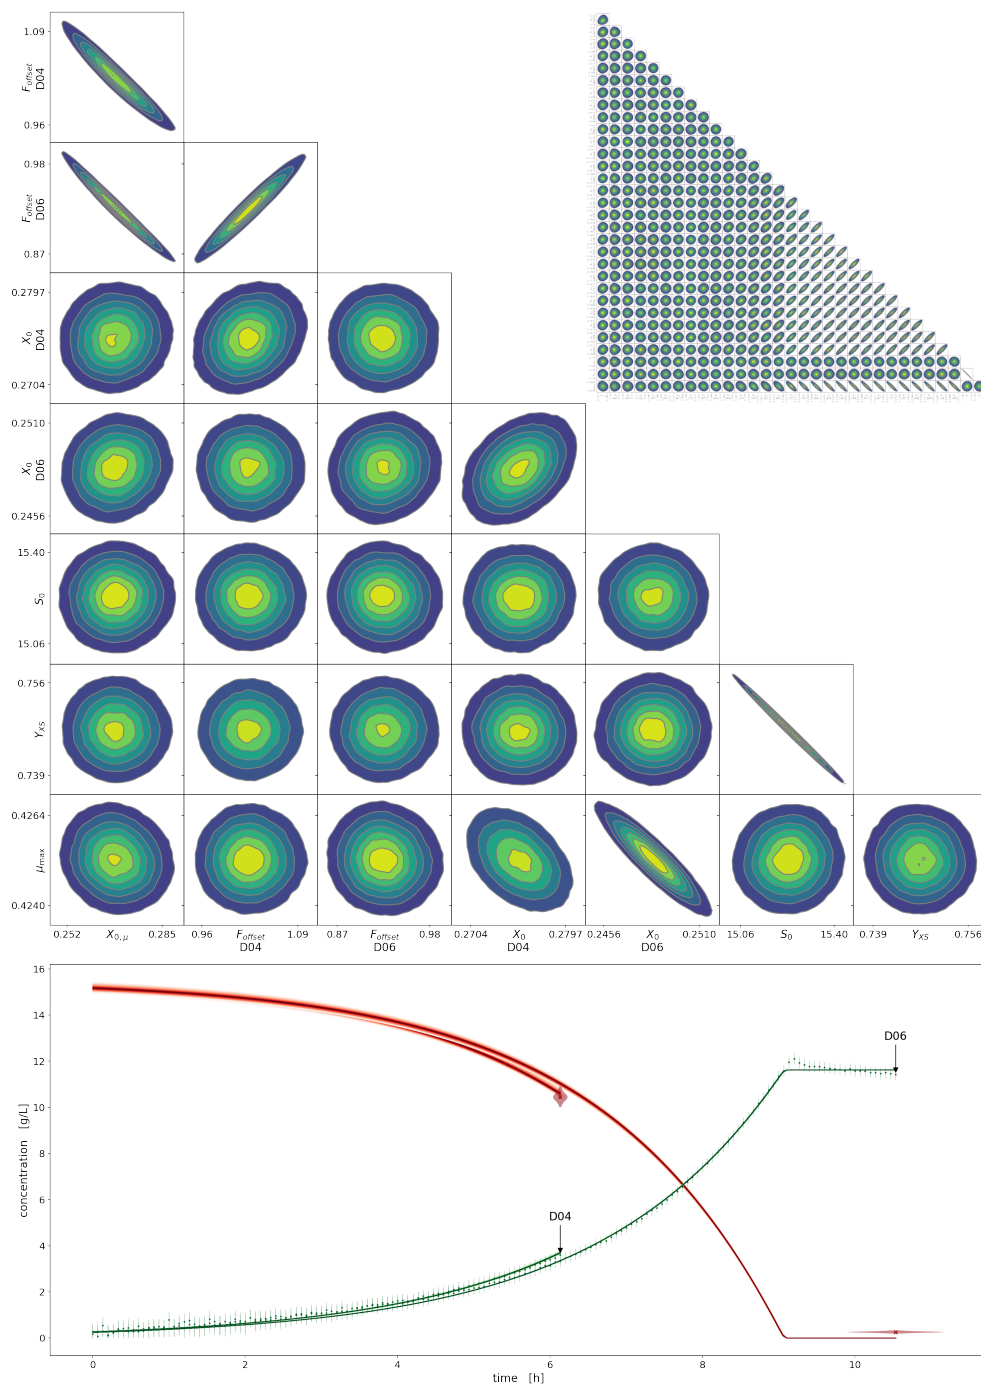

**Figure 13: Parameter correlations, data and posterior distributions of growth curves**

Each kernel density estimate (KDE) in the top half shows a 2-dimensional cross-section of the full posterior, visualizing correlations between some of the model parameters. For example, the topmost KDE shows that the posterior samples of  $F_{\text{offset\_D04}}$  are correlated with  $X_{0,\mu}$ . Axis labels correspond to the lower- and upper-bound of 90 % HDIs. The large pair plot shows just the marginals that are relevant for the replicates D04 and D06, whereas the small pair plot shows the dimensions for all parameters (high resolution in appendix). In the bottom half of the figure, the kinetics of replicates D04 and D06 are drawn. The red (substrate) and green (biomass) densities correspond to the distribution of predictions obtained from posterior samples, as described in [Section 3.2.7](#). The red violins visualize the posterior inferred from single glucose measurement responses without the use of the process model. Likewise, the green vertical bars on the biomass concentrations show the 90% HDI.

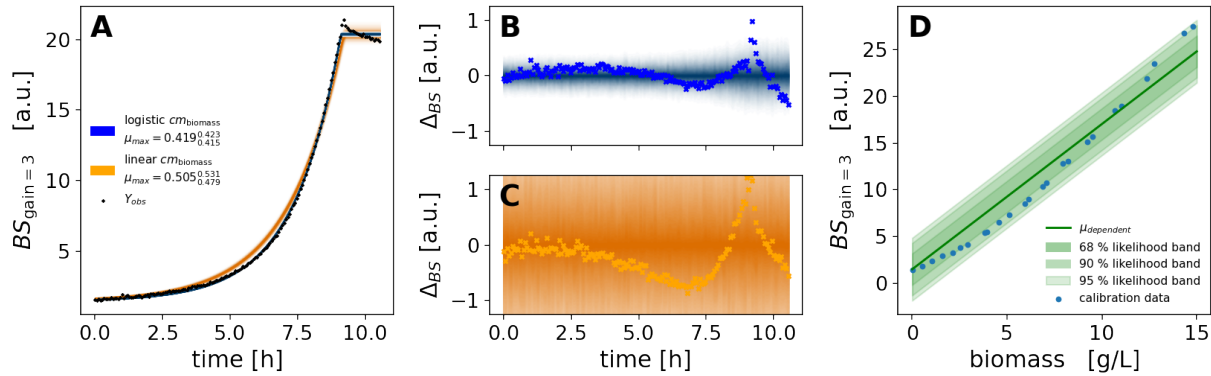

**Figure 14: Comparison of Monod model fit with linear error model**

Two Monod kinetic process models were fitted to the same observations from culture well D06 utilizing either a linear calibration model for the biomass/backscatter relationship (D, orange) or the previously established logistic model (blue). In A the posterior distribution of backscatter observations (density bands) is overlaid with actual backscatter observations. A linear calibration model with fixed intercept (Section 3.1.5) D was fitted to the subset of calibration data points up to 15 g/L such that it covers the range of biomass concentrations expected in the experiment. Residual plots of the observations compared to the posterior predictive distribution of backscatter observations (B, C) show that the fit obtained with the logistic calibration model (blue) has much less *lack-of-fit* compared to the one with the linear model (orange). Note that the backscatter residuals of  $\pm 1\%$  are small compared to the amplitude of the absolute values going from close to 0 to approximately 20. The discrepancy between the two models is also evident from the 90% HDI of the maximum growth rate  $\mu_{\text{max}}$  of  $[0.415, 0.423] h^{-1}$  in the logistic and  $[0.479, 0.531] h^{-1}$  in the linear case.

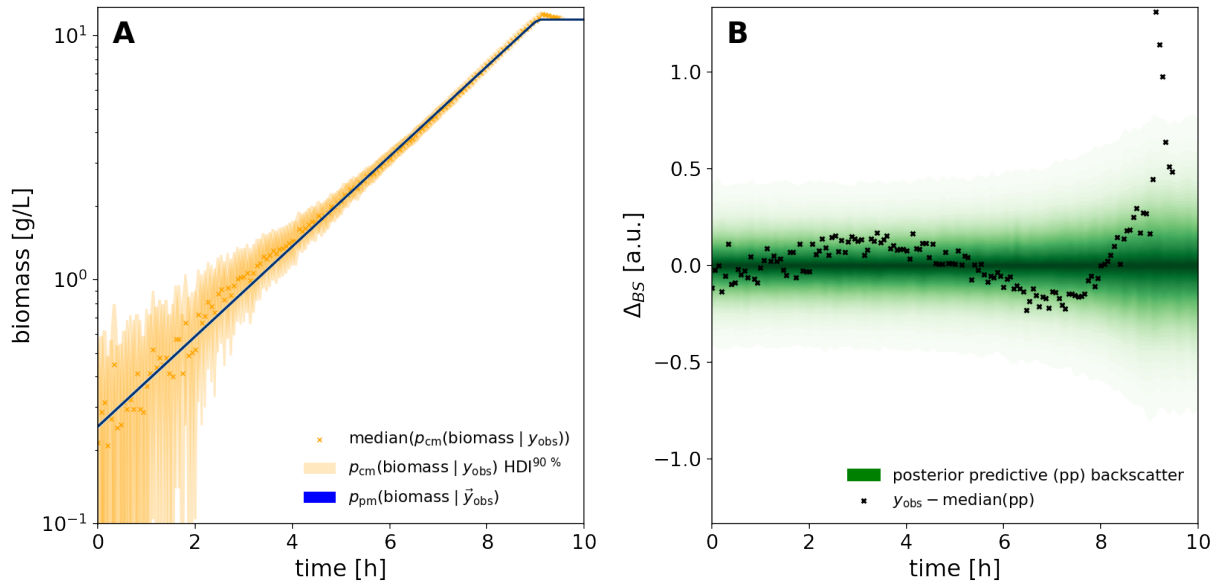

**Figure 15: Predictions, observations and residuals of Monod model fitted to backscatter data**

A: Through a logarithmic y-axis, the plot A shows that both process model (blue density) and the  $\text{HDI}_{\text{biomass}}^{90\%}$  obtained from the biomass calibration model with individual observations (orange) describe an exponentially increasing biomass concentration up to approximately 9 hours. B: The residuals between prediction and observed backscatter (black) and the posterior predictive backscatter distribution (green density) show that the *lack-of-fit* is consistently less than  $\pm 0.25$  backscatter units with the exception of a fluctuation at the time of substrate depletion.

972 by the Monod model is generally suitable for the growth on glucose, since the blue density is describing the trend of  
 973 observations well.

974 To evaluate a lack-of-fit, the residual plot (Figure 15, B) should be considered. Here, the residuals between the process  
 975 model posterior and the observed backscatter are shown in black, the respective posterior predictive distribution of  
 976 measurement responses (Section 3.2.3) is shown in green. The posterior predictive is the distribution of measurement  
 977 responses that the model predicts. First, biomass concentrations are drawn from the posterior distribution. At each  
 978 biomass concentration, another sample is taken from the Student- $t$  distribution predicted by the biomass calibration  
 979 model.  
 980 First of all, a large deviation that cannot be explained with the uncertainty of the estimate can be observed after 8 hours.  
 981 Looking at the data, e.g. in Figure 14, it can be seen that it accounts for the previously described overshoot of the  
 982 backscatter signal at the beginning of the stationary phase (Section 4.2.2). This phenomenon cannot be explained by the  
 983 Monod model, which assumes a constant biomass concentration after substrate depletion. Further investigations are  
 984 needed to identify whether the change is morphological, e.g. a shrinking of cells to due carbon source depletion, or a  
 985 decrease of biomass, e.g. by cell lysis.  
 986 Before 8 hours, an s-shaped systematic deviation can be observed, meaning that the observations first lie above and  
 987 then below the prediction. Apart from the influence of the overshoot, which distorts the fit, this might be explained  
 988 by a different growth rate. It was previously shown that *C. glutamicum* exhibits a higher specific growth rate on  
 989 protocatechuic acid (PCA), which is a component of the cultivation medium CGXII [59]. Upon depletion of PCA after  
 990 the first hours of cultivation, the growth rate decreases accordingly. This is not accounted for in the Monod kinetics,  
 991 which describe an effectively constant growth rate at substrate concentrations much higher than the  $K_S$  value. To cover  
 992 this effect, PCA must be measured, e.g. by sampling and liquid chromatography, and a more elaborate process models  
 993 with several substrates must be utilized. Nevertheless, the very simple Monod kinetics describe the overall growth  
 994 behaviour well and residuals are low.

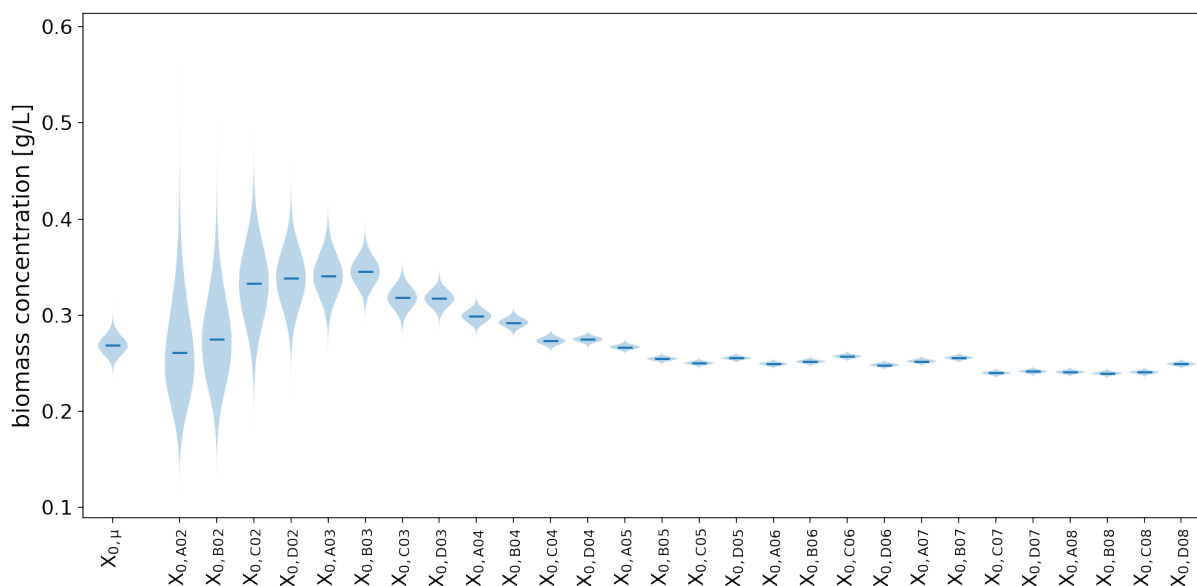

**Figure 16: Posterior group mean and well-specific initial biomass concentrations  $X_0$**

Variability between the growth curves in separate wells is described by well-specific initial biomass concentrations  $X_{0,well}$ . Their posterior probability distribution is wide if the well was sacrificed early (left) and narrows down with the number of observed timepoints (right). Their common hyper-prior (a.k.a group mean prior)  $X_{0,\mu}$  for the mean of each  $X_{0,well}$  was updated to a posterior with  $\text{HDI}_{X_{0,\mu}}^{90\%} = [0.250, 0.288] \frac{g}{L}$ .

995 In Figure 12, we have seen that the time differences in the exponential phases between replicates are well explained  
 996 by the well-wise initial biomass concentrations  $\vec{X}_0$ . The choice of a hierarchical process models is further evaluated  
 997 in Figure 16, which shows the estimated  $\vec{X}_0$  with uncertainties for all replicates. For replicates with more evidence  
 998 (longer time series), the posterior probability for their initial biomass concentration is concentrated in a narrow interval,  
 999 whereas  $X_0$  in wells with little evidence was estimated with considerably more uncertainty. The posterior for the group  
 1000 mean  $X_{0,\mu}$  is concentrated at  $\text{HDI}_{X_{0,\mu}}^{90\%} = [0.251, 0.286] \frac{g}{L}$ , close to the theoretical concentration ( $0.25 \frac{g}{L}$ ) expected  
 1001 from the experimental design.

1002 Overall, the well-wise modeling of initial biomass concentrations as well as the separate modeling of replicates allowed



1003 us to account for inevitable differences between wells, while inferring the key process model parameters from all data.  
1004 The combination of `calibr8` and `murefi` made it possible to construct a process models of our application example  
1005 with little code and apply both optimization (MLE) and Bayesian inference (MCMC) without needing to change any  
1006 implementation details ([Code 4](#), [Code 5](#)). Our application example showed that Bayesian inference with ODE-based  
1007 process models to 28 parallel cultures with hundreds of observations is not only technically feasible, but also accessible  
1008 without deep understanding of probabilistic programming frameworks.  
1009 As implied in the famous quote by George E.P. Box – *"All models are wrong, but some are useful."* – also our  
1010 Monod kinetics process model does not describe every aspect of the data, but is a powerful tool to quantify key  
1011 process parameters under uncertainty. From its (in)accuracies, we can gain insight into the bioprocess and generate  
1012 new hypotheses about the biological process or measurement system that are yet to be understood. In our case, the  
1013 uncertainty quantification of process model parameters can become the cornerstone of bioprocess development by  
1014 facilitating robust and intuitive statistical analysis or Bayesian decision-making.

### 1015 4.3 Comparison with existing modeling software

1016 A multitude of statistical software tools exist, many of which can be used for data analyses similar to the ones presented  
1017 in this work. The technical complexity of performing such analyses, however, depends strongly on the technical  
1018 capabilities of the software package. A comparison to relevant packages with similar scope and use-cases is given in  
1019 [Table 1](#).  
1020 For higher-throughput analyses and flexibility in the data analysis workflow, the user interface of statistical analysis  
1021 software is particularly important. Most tools provide interfaces for popular scripting languages such as Python, R  
1022 or MATLAB, but the model definition is in some cases delegated to a domain-specific programming language (DSL).  
1023 For a broad application of calibration models, it is important that they are modular. Software like COPASI considers  
1024 calibration only in the context of the ODE model and likelihoods cannot be customized. With modeling toolboxes such  
1025 as Data2Dynamics or PESTO, custom calibration models and likelihoods can be realized, but they must be implemented  
1026 manually as part of the objective function. This does not only require advanced expertise, but is also more error prone  
1027 than working with a PPL directly. In contrast, `calibr8` separates calibration modeling entirely from the process  
1028 modeling workflow, thereby becoming a valuable toolbox for calibration tasks even without process modeling. Together  
1029 with `murefi`, this modular design allows to seamlessly use custom likelihood models in advanced ODE process models,  
1030 a feature that we have not found with other software.  
1031 An important criterion for usability of calibration software is the required expertise. Packages that implement the  
1032 foundations of model construction, auto-differentiation and definition of probability densities reduce the mathematical  
1033 complexity and allow users with little technical expertise to perform advanced statistical analyses. `calibr8` and  
1034 `murefi` are beginner-friendly, which is also evident from the simplicity of code examples [61, 62] compared to other  
1035 tools [63, 64].  
1036 Bayesian analysis through MCMC methods is available through most modeling packages. Efficient, gradient-based  
1037 state-of-the-art MCMC algorithms however are only readily available with probabilistic programming languages such  
1038 as PyMC3 or Stan because they provide the necessary auto-differentiation of models. Finally, experimental replicates or  
1039 hierarchical structures require replication and nesting of ODE models. Instead of manually expanding the differential  
1040 equation system to match these requirements, templating approaches as they are used in `murefi` or COPASI can  
1041 facilitate rapid model construction.

**Table 1: Comparison with related software packages**  
 DSL: Domain-Specific Language, GUI: Graphical User Interface

|                                    | User interfaces    | Modularity of likelihood model | Required expertise | MCMC                | ODE model construction | License            |
|------------------------------------|--------------------|--------------------------------|--------------------|---------------------|------------------------|--------------------|
| <b>murefi, calibr8</b>             | Python             | Modular                        | Low                | Yes, with auto-diff | Templated              | AGPLv3             |
| <b>PyMC3</b> [46]                  | Python             | Manual                         | Medium             | Yes, with auto-diff | Manual                 | Apache 2.0         |
| <b>COPASI, PyCoTools3</b> [16, 17] | GUI, Python        | No                             | Medium             | No                  | Templated              | Artistic 2.0, LGPL |
| <b>Data2Dynamics</b> [14]          | MATLAB, DSL        | Manual                         | Medium             | Yes                 | Manual                 | Not specified      |
| <b>PESTO</b> [15]                  | MATLAB             | Manual                         | High               | Yes                 | Manual                 | BSD-3              |
| <b>Stan</b> [48]                   | DSL                | Manual                         | High               | Yes, with auto-diff | Manual                 | BSD-3              |
| <b>brms</b> [65]                   | R, Formula-based   | Modular                        | Low                | Yes, with auto-diff | N/A                    | GPLv2              |
| <b>JMP</b> [66]                    | GUI, HTTP (plugin) | No                             | Medium             | No                  | N/A                    | Proprietary        |

## 1042 5 Conclusions

1043 In this paper, we introduced the general concept of *calibration models* and presented *calibr8*, an object-oriented  
 1044 Python toolbox that is applicable to both analytical calibration and inference of process models. Our open-source  
 1045 software allows to easily implement and analyze calibration models by providing a number of convenience functions, for  
 1046 example an asymmetric logistic function with an intuitive parametrization and a function to obtain the most important  
 1047 diagnostic plots in one line of code. It thus gives users without a background in statistics access to quantitative linear  
 1048 and non-linear calibration models, as well as Bayesian uncertainty quantification. Furthermore, the implementation  
 1049 through a suite of extendable Python classes allows advanced modelers to customize the technique to a variety of  
 1050 applications. In comparison to existing software, the unique combination of modular likelihood functions from *calibr8*  
 1051 with objectives and (hierarchical) datasets from *murefi* enables a fully Bayesian, Pythonic approach to calibration and  
 1052 process modeling that could so far only be achieved by cumbersome manual implementation or combination of various  
 1053 libraries.

1054 In our work, we demonstrated how the versatile asymmetric logistic calibration model can be applied to bioanalytical  
 1055 calibration tasks. Furthermore, we showed how combining the concept of calibration models with process models  
 1056 allows to gain process insight into a biological process. Especially in combination with *murefi*, our package to set  
 1057 up multi-replicate models, *calibr8* is suitable for high-throughput experimentation because of the flexible interface  
 1058 that allows to analyze data via optimization or MCMC. Uncertainty quantification is covered within the scope of the  
 1059 toolbox and enables easy identification of critical parameters. By making Bayesian inference of ODE models easy to  
 1060 implement, *calibr8* and *murefi* bridge the gap between bioprocess modeling and an entire portfolio of methods, such  
 1061 as Bayesian model comparison or decision-making.

1062 Well-chosen calibration models eradicate the effect of systematic errors in measurements and allow the practitioner  
 1063 to focus a data analysis on the underlying process. In our application example, the non-linear biomass calibration  
 1064 model was required to identify lack-of-fit in the Monod model based on growth behaviour alone. We also identified  
 1065 the biomass overshoot at the beginning of the stationary phase as an interesting target for further investigation, *e.g.* by  
 1066 automated microscopy of cells during cultivation.

1067 *calibr8* greatly reduces the workload of calibration tasks. For example, the systematic, model-based approach allows  
 1068 the user to quantify batch effects between calibration experiments; repetition of calibration measurements could thus

1069 be highly reduced. With `calibr`, we provide a versatile toolbox that we believe to be beneficial not only for the  
1070 biotechnology community, but for various calibration tasks in experimental sciences.

## 1071 **6 Acknowledgements**

1072 First developments of data structures for multi-replicate modeling were made by Michael Osthege in the Theoretical  
1073 Systems Biology group of Prof. Roland Eils at the German Cancer Research Center under the supervision of Dr. Stefan  
1074 Kallenberger. The conceptual framework for modular representation of calibration models was devised and implemented  
1075 by Laura Helleckes and Michael Osthege. Experiments were designed, programmed and conducted by Laura Helleckes  
1076 and Michael Osthege, as was the data analysis. Eric von Lieres, Marco Oldiges and Wolfgang Wiechert reviewed  
1077 the manuscript, organized funding and were responsible for supervision and project coordination. This work was  
1078 funded by the German Federal Ministry of Education and Research (BMBF, Grand. No. 031B0463A) as part of the  
1079 project "Digitalization In Industrial Biotechnology", DigInBio. Further funding was received from the Enabling Spaces  
1080 Program "Helmholtz Innovation Labs" of the German Helmholtz Association to support the "Microbial Bioprocess Lab  
1081 – A Helmholtz Innovation Lab".

## 1082 References

- 1083 [1] European Medicines Agency. *Guideline on bioanalytical method validation*. 2015. URL: <https://www.ema.europa.eu/en/bioanalytical-method-validation>.
- 1084
- 1085 [2] U.S. Department of Health et al. *Bioanalytical Method Validation - Guidance for Industry*. 2018. URL: <https://www.fda.gov/media/70858/download>.
- 1086
- 1087 [3] Francisco Raposo. “Evaluation of analytical calibration based on least-squares linear regression for instrumental techniques: A tutorial review”. In: *TrAC Trends in Analytical Chemistry* 77 (2016), pp. 167–185.
- 1088
- 1089 [4] John W. A. Findlay et al. “Validation of immunoassays for bioanalysis: a pharmaceutical industry perspective”. In: *Journal of pharmaceutical and biomedical analysis* 21.6 (2000), pp. 1249–1273.
- 1090
- 1091 [5] Binodh DeSilva et al. “Recommendations for the bioanalytical method validation of ligand-binding assays to support pharmacokinetic assessments of macromolecules”. In: *Pharmaceutical research* 20.11 (2003), pp. 1885–1900.
- 1092
- 1093
- 1094 [6] Darshana Jani et al. “Recommendations for use and fit-for-purpose validation of biomarker multiplex ligand binding assays in drug development”. In: *The AAPS journal* 18.1 (2016), pp. 1–14.
- 1095
- 1096 [7] Elizabeth B Cogan, G Bruce Birrell, and O Hayes Griffith. “A robotics-based automated assay for inorganic and organic phosphates”. In: *Analytical biochemistry* 271.1 (1999), pp. 29–35.
- 1097
- 1098 [8] Simon Unthan et al. “Bioprocess automation on a Mini Pilot Plant enables fast quantitative microbial phenotyping”. In: *Microbial cell factories* 14.1 (2015), p. 32.
- 1099
- 1100 [9] Andreas Knepper et al. “Robotic platform for parallelized cultivation and monitoring of microbial growth parameters in microwell plates”. In: *Journal of laboratory automation* 19.6 (2014), pp. 593–601.
- 1101
- 1102 [10] International Bureau of Weights and Measures. *International vocabulary of metrology — Basic and general concepts and associated terms*. 2008. URL: [https://www.bipm.org/utils/common/documents/jcgm/JCGM\\_200\\_2008.pdf](https://www.bipm.org/utils/common/documents/jcgm/JCGM_200_2008.pdf).
- 1103
- 1104
- 1105 [11] Rink Hoekstra et al. “Robust misinterpretation of confidence intervals”. In: *Psychonomic bulletin & review* 21.5 (2014), pp. 1157–1164.
- 1106
- 1107 [12] Sander Greenland et al. “Statistical tests, P values, confidence intervals, and power: a guide to misinterpretations”. In: *European journal of epidemiology* 31.4 (2016), pp. 337–350.
- 1108
- 1109 [13] Ward Edwards, Harold Lindman, and Leonard J Savage. “Bayesian statistical inference for psychological research.” In: *Psychological review* 70.3 (1963), p. 193.
- 1110
- 1111 [14] Andreas Raue et al. “Data2Dynamics: a modeling environment tailored to parameter estimation in dynamical systems”. In: *Bioinformatics* 31.21 (2015), pp. 3558–3560.
- 1112
- 1113 [15] Paul Stapor et al. “PESTO: parameter estimation toolbox”. In: *Bioinformatics* 34.4 (2018), pp. 705–707.
- 1114 [16] Ciaran M Welsh et al. “PyCoTools: a Python toolbox for COPASI”. In: *Bioinformatics* 34.21 (May 2018), pp. 3702–3710. ISSN: 1367-4803. DOI: [10.1093/bioinformatics/bty409](https://doi.org/10.1093/bioinformatics/bty409). eprint: <https://academic.oup.com/bioinformatics/article-pdf/34/21/3702/26146986/bty409.pdf>. URL: <https://doi.org/10.1093/bioinformatics/bty409>.
- 1115
- 1116
- 1117
- 1118 [17] Stefan Hoops et al. “COPASI—a complex pathway simulator”. In: *Bioinformatics* 22.24 (2006), pp. 3067–3074.
- 1119 [18] Rens van de Schoot et al. “Bayesian statistics and modelling”. In: *Nature Reviews Methods Primers* 1.1 (2021), pp. 1–26.
- 1120
- 1121 [19] Fabian Fröhlich, Carolin Loos, and Jan Hasenauer. “Scalable inference of ordinary differential equation models of biochemical processes”. In: *Gene Regulatory Networks*. Springer, 2019, pp. 385–422.
- 1122
- 1123 [20] Frank Kensy et al. “Validation of a high-throughput fermentation system based on online monitoring of biomass and fluorescence in continuously shaken microtiter plates”. In: *Microbial Cell Factories* 8.1 (2009), p. 31.
- 1124
- 1125 [21] Shukuo Kinoshita, Kiyoshi Nakayama, and Sadao Akita. “Taxonomical Study of Glutamic Acid Accumulating Bacteria, *Micrococcus glutamicus* nov. sp.” In: *Journal of the Agricultural Chemical Society of Japan* 22.3 (1958), pp. 176–185.
- 1126
- 1127
- 1128 [22] Michael Osthege and Laura Helleckes. *JuBiotech/robotools: v1.0.0*. Version v1.0.0. Apr. 2021. DOI: [10.5281/zenodo.4697606](https://doi.org/10.5281/zenodo.4697606). URL: <https://doi.org/10.5281/zenodo.4697606>.
- 1129
- 1130 [23] John Salvatier et al. *pymc-devs/pymc3: PyMC3 3.11.2 (14 March 2021)*. Version v3.11.2. Mar. 2021. DOI: [10.5281/zenodo.4603971](https://doi.org/10.5281/zenodo.4603971). URL: <https://doi.org/10.5281/zenodo.4603971>.
- 1131
- 1132 [24] Ravin Kumar et al. “ArviZ a unified library for exploratory analysis of Bayesian models in Python”. In: *Journal of Open Source Software* 4.33 (2019), p. 1143.
- 1133
- 1134 [25] Francesco Biscani and Dario Izzo. “A parallel global multiobjective framework for optimization: pagmo”. In: *Journal of Open Source Software* 5.53 (2020), p. 2338. DOI: [10.21105/joss.02338](https://doi.org/10.21105/joss.02338). URL: <https://doi.org/10.21105/joss.02338>.
- 1135
- 1136

- 1137 [26] J. D. Hunter. “Matplotlib: A 2D graphics environment”. In: *Computing in Science & Engineering* 9.3 (2007),  
1138 pp. 90–95. DOI: [10.1109/MCSE.2007.55](https://doi.org/10.1109/MCSE.2007.55).
- 1139 [27] Charles R. Harris et al. “Array programming with NumPy”. In: *Nature* 585.7825 (Sept. 2020), pp. 357–362. DOI:  
1140 [10.1038/s41586-020-2649-2](https://doi.org/10.1038/s41586-020-2649-2). URL: <https://doi.org/10.1038/s41586-020-2649-2>.
- 1141 [28] Wes McKinney. “Data Structures for Statistical Computing in Python”. In: *Proceedings of the 9th Python in*  
1142 *Science Conference*. Ed. by Stéfan van der Walt and Jarrod Millman. 2010, pp. 56–61. DOI: [10.25080/Majora-](https://doi.org/10.25080/Majora-92bf1922-00a)  
1143 [92bf1922-00a](https://doi.org/10.25080/Majora-92bf1922-00a).
- 1144 [29] The pandas development team. *pandas-dev/pandas: Pandas*. Version latest. Feb. 2020. DOI: [10.5281/zenodo.](https://doi.org/10.5281/zenodo.3509134)  
1145 [3509134](https://doi.org/10.5281/zenodo.3509134). URL: <https://doi.org/10.5281/zenodo.3509134>.
- 1146 [30] Pauli Virtanen et al. “SciPy 1.0: Fundamental Algorithms for Scientific Computing in Python”. In: *Nature*  
1147 *Methods* 17 (2020), pp. 261–272. DOI: [10.1038/s41592-019-0686-2](https://doi.org/10.1038/s41592-019-0686-2).
- 1148 [31] Michael Osthege and Laura Helleckes. *JuBiotech/calibr8: v6.0.0*. Version v5.0.1. Oct. 2020. DOI: [10.5281/](https://doi.org/10.5281/zenodo.4127012)  
1149 [zenodo.4127012](https://doi.org/10.5281/zenodo.4127012). URL: <https://github.com/JuBiotech/calibr8>.
- 1150 [32] Laura Helleckes and Michael Osthege. *JuBiotech/murefi: v5.0.0*. Version v5.0.0. Mar. 2020. DOI: [10.5281/](https://doi.org/10.5281/zenodo.4652910)  
1151 [zenodo.4652910](https://doi.org/10.5281/zenodo.4652910). URL: <https://github.com/JuBiotech/murefi>.
- 1152 [33] Paul G. Gottschalk and John R. Dunn. “The five-parameter logistic: A characterization and comparison with the  
1153 four-parameter logistic”. In: *Analytical Biochemistry* 343.1 (2005), pp. 54–65.
- 1154 [34] Agnieszka Szparaga and Sławomir Kocira. “Generalized logistic functions in modelling emergence of *Brassica*  
1155 *napus* L.” In: *PLOS ONE* 13.8 (Aug. 2018), pp. 1–14. DOI: [10.1371/journal.pone.0201980](https://doi.org/10.1371/journal.pone.0201980). URL:  
1156 <https://doi.org/10.1371/journal.pone.0201980>.
- 1157 [35] Wikipedia contributors. *Generalised logistic function — Wikipedia, The Free Encyclopedia*. [https://en.](https://en.wikipedia.org/w/index.php?title=Generalised_logistic_function&oldid=945474789)  
1158 [wikipedia.org/w/index.php?title=Generalised\\_logistic\\_function&oldid=945474789](https://en.wikipedia.org/w/index.php?title=Generalised_logistic_function&oldid=945474789). [Online;  
1159 accessed 2-April-2020]. 2020.
- 1160 [36] Aaron Meurer et al. “SymPy: symbolic computing in Python”. In: *PeerJ Computer Science* 3 (Jan. 2017), e103.  
1161 ISSN: 2376-5992. DOI: [10.7717/peerj-cs.103](https://doi.org/10.7717/peerj-cs.103). URL: <https://doi.org/10.7717/peerj-cs.103>.
- 1162 [37] Brandon T. Willard et al. *pymc-devs/aesara: version rel-2.0.7*. Apr. 2021. DOI: [10.5281/zenodo.4635498](https://doi.org/10.5281/zenodo.4635498).  
1163 URL: <https://doi.org/10.5281/zenodo.4635498>.
- 1164 [38] Atılım Günes Baydin et al. “Automatic Differentiation in Machine Learning: A Survey”. In: *J. Mach. Learn. Res.*  
1165 18.1 (Jan. 2017), pp. 5595–5637. ISSN: 1532-4435.
- 1166 [39] Adrian Seyboldt et al. *aseboldt/sunode v0.1.2*. Version v0.1.2. Sept. 2020. DOI: [10.5281/zenodo.4058330](https://doi.org/10.5281/zenodo.4058330).  
1167 URL: <https://doi.org/10.5281/zenodo.4058330>.
- 1168 [40] Alan C. Hindmarsh et al. “SUNDIALS: Suite of Nonlinear and Differential/Algebraic Equation Solvers”. In:  
1169 *ACM Trans. Math. Softw.* 31.3 (Sept. 2005), pp. 363–396. ISSN: 0098-3500. DOI: [10.1145/1089014.1089020](https://doi.org/10.1145/1089014.1089020).  
1170 URL: <https://doi.org/10.1145/1089014.1089020>.
- 1171 [41] The HDF Group. *Hierarchical Data Format, version 5*. <http://www.hdfgroup.org/HDF5/>. 1997.
- 1172 [42] Andrew Collette. *Python and HDF5*. O’Reilly, 2013.
- 1173 [43] Nicholas Metropolis et al. “Equation of State Calculations by Fast Computing Machines”. In: *The Journal of*  
1174 *Chemical Physics* 21.6 (1953), pp. 1087–1092. DOI: [10.1063/1.1699114](https://doi.org/10.1063/1.1699114). eprint: [https://doi.org/10.](https://doi.org/10.1063/1.1699114)  
1175 [1063/1.1699114](https://doi.org/10.1063/1.1699114). URL: <https://doi.org/10.1063/1.1699114>.
- 1176 [44] Cajo J. F. ter Braak and Jasper A. Vrugt. “Differential Evolution Markov Chain with snooker updater and fewer  
1177 chains”. In: *Statistics and Computing* 18.4 (Dec. 2008), pp. 435–446. ISSN: 1573-1375. DOI: [10.1007/s11222-](https://doi.org/10.1007/s11222-008-9104-9)  
1178 [008-9104-9](https://doi.org/10.1007/s11222-008-9104-9). URL: <https://doi.org/10.1007/s11222-008-9104-9>.
- 1179 [45] Matthew D. Hoffman and Andrew Gelman. “The No-U-Turn Sampler: Adaptively Setting Path Lengths in  
1180 Hamiltonian Monte Carlo”. In: *Journal of Machine Learning Research* 15.47 (2014), pp. 1593–1623. URL:  
1181 <http://jmlr.org/papers/v15/hoffman14a.html>.
- 1182 [46] John Salvatier, Thomas V. Wiecki, and Christopher Fonnesbeck. “Probabilistic programming in Python using  
1183 PyMC3”. In: *PeerJ Computer Science* 2 (Apr. 2016), e55. DOI: [10.7717/peerj-cs.55](https://doi.org/10.7717/peerj-cs.55). URL: <https://doi.org/10.7717/peerj-cs.55>.  
1184 <https://doi.org/10.7717/peerj-cs.55>.
- 1185 [47] Eli Bingham et al. “Pyro: Deep Universal Probabilistic Programming”. In: *Journal of Machine Learning Research*  
1186 (2018).
- 1187 [48] Bob Carpenter et al. “Stan: A Probabilistic Programming Language”. In: *Journal of Statistical Software, Articles*  
1188 76.1 (2017), pp. 1–32. ISSN: 1548-7660. DOI: [10.18637/jss.v076.i01](https://doi.org/10.18637/jss.v076.i01). URL: [https://www.jstatsoft.](https://www.jstatsoft.org/v076/i01)  
1189 [org/v076/i01](https://www.jstatsoft.org/v076/i01).
- 1190 [49] Joshua V. Dillon et al. *TensorFlow Distributions*. 2017. arXiv: [1711.10604](https://arxiv.org/abs/1711.10604) [cs.LG].



- 1191 [50] Cajo J. F. Ter Braak. “A Markov Chain Monte Carlo version of the genetic algorithm Differential Evolution: easy  
1192 Bayesian computing for real parameter spaces”. In: *Statistics and Computing* 16.3 (Sept. 2006), pp. 239–249.  
1193 ISSN: 1573-1375. DOI: [10.1007/s11222-006-8769-1](https://doi.org/10.1007/s11222-006-8769-1). URL: <https://doi.org/10.1007/s11222-006-8769-1>.  
1194
- 1195 [51] Iain Murray, Ryan Adams, and David MacKay. “Elliptical slice sampling”. In: *Proceedings of the Thirteenth  
1196 International Conference on Artificial Intelligence and Statistics*. Ed. by Yee Whye Teh and Mike Titterton.  
1197 Vol. 9. Proceedings of Machine Learning Research. Chia Laguna Resort, Sardinia, Italy: PMLR, 2010, pp. 541–  
1198 548. URL: <http://proceedings.mlr.press/v9/murray10a.html>.
- 1199 [52] John W. A. Findlay and Robert F. Dillard. “Appropriate calibration curve fitting in ligand binding assays”. In:  
1200 *The AAPS journal* 9.2 (2007), E260–E267.
- 1201 [53] Mitra Azadeh et al. “Calibration curves in quantitative ligand binding assays: recommendations and best practices  
1202 for preparation, design, and editing of calibration curves”. In: *The AAPS journal* 20.1 (2018), p. 22.
- 1203 [54] Johannes Hemmerich et al. “Microbioreactor Systems for Accelerated Bioprocess Development”. In: *Biotechnol-  
1204 ogy Journal* 13.4 (2018), p. 1700141. DOI: <https://doi.org/10.1002/biot.201700141>. eprint: <https://onlinelibrary.wiley.com/doi/pdf/10.1002/biot.201700141>. URL: <https://onlinelibrary.wiley.com/doi/abs/10.1002/biot.201700141>.
- 1205  
1206
- 1207 [55] Lothar Eggeling and Michael Bott. *Handbook of Corynebacterium glutamicum*. CRC press, 2005.
- 1208 [56] Jacques Monod. “The Growth of Bacterial Cultures”. In: *Annual Review of Microbiology* 3.1 (1949), pp. 371–394.  
1209 DOI: [10.1146/annurev.mi.03.100149.002103](https://doi.org/10.1146/annurev.mi.03.100149.002103). eprint: <https://doi.org/10.1146/annurev.mi.03.100149.002103>. URL: <https://doi.org/10.1146/annurev.mi.03.100149.002103>.
- 1210
- 1211 [57] Heinrich Senn et al. “The growth of Escherichia coli in glucose-limited chemostat cultures: a re-examination  
1212 of the kinetics”. In: *Biochimica et Biophysica Acta (BBA) - General Subjects* 1201.3 (1994), pp. 424–436.  
1213 ISSN: 0304-4165. DOI: [https://doi.org/10.1016/0304-4165\(94\)90072-8](https://doi.org/10.1016/0304-4165(94)90072-8). URL: <http://www.sciencedirect.com/science/article/pii/0304416594900728>.  
1214
- 1215 [58] Johannes Hemmerich et al. “Less Sacrifice, More Insight: Repeated Low-Volume Sampling of Microbioreactor  
1216 Cultivations Enables Accelerated Deep Phenotyping of Microbial Strain Libraries”. In: *Biotechnology Journal*  
1217 14.9 (2019), p. 1800428. DOI: [10.1002/biot.201800428](https://doi.org/10.1002/biot.201800428). URL: <https://onlinelibrary.wiley.com/doi/abs/10.1002/biot.201800428>.
- 1218
- 1219 [59] Simon Unthan et al. “Beyond growth rate 0.6: What drives Corynebacterium glutamicum to higher growth rates  
1220 in defined medium”. In: *Biotechnology and bioengineering* 111.2 (2014), pp. 359–371.
- 1221 [60] Michael Betancourt. *Hierarchical Modeling*. 2020. URL: [https://betanalpha.github.io/assets/case\\_](https://betanalpha.github.io/assets/case_studies/hierarchical_modeling.html)  
1222 [studies/hierarchical\\_modeling.html](https://betanalpha.github.io/assets/case_studies/hierarchical_modeling.html).
- 1223 [61] *calibr8 Documentation*. URL: <https://calibr8.readthedocs.io>.
- 1224 [62] *murefi Documentation*. URL: <https://murefi.readthedocs.io>.
- 1225 [63] *PyCoTools Documentation*. URL: <https://pycotools3.readthedocs.io>.
- 1226 [64] *d2d Examples*. URL: [https://github.com/Data2Dynamics/d2d/tree/master/arFramework3/](https://github.com/Data2Dynamics/d2d/tree/master/arFramework3/Examples)  
1227 [Examples](https://github.com/Data2Dynamics/d2d/tree/master/arFramework3/Examples).
- 1228 [65] Paul-Christian Bürkner. “brms: An R package for Bayesian multilevel models using Stan”. In: *Journal of  
1229 statistical software* 80.1 (2017), pp. 1–28.
- 1230 [66] SAS Institute. *JMP*. URL: <https://www.jmp.com>.

## 1231 A Appendix

### 1232 A.1 Reparametrization of asymmetric logistic function

1233 For simplicity of the reparameterization, the asymptote parameters  $L_L$  and  $L_U$  of the original *Richard's Curve* (11) can  
 1234 be omitted and substitutions  $b = -B$  and  $1/v = -e^{-c}$  were made such that all parameters may be real numbers (17).  
 1235 In (18) the symmetry is already parametrized exactly as in the final result (12): As it increases, the inflection point  $I_y$   
 1236 moves towards the upper limit. At  $c = 0$  it lies centered between the limits.

$$f(x) = \frac{1}{(1 + e^{-b(a-x)})e^{-c}} \quad (17)$$

$$a, b, c \in \mathcal{R}$$

1237 In the following steps  $a$  and  $b$  are reparametrized in terms of the  $x$ -coordinate of the inflection point  $I_x$  and the slope  $S$   
 1238 at the inflection point respectively.  $I_x$  was obtained by solving the second derivative of the  $a, b, c$  parametrization (17)  
 1239 for  $a$  (18):

$$f''(I_x) = 0$$

$$\Leftrightarrow I_x = a - \frac{c}{b} \quad (18)$$

$$\Leftrightarrow a = I_x + \frac{c}{b}$$

1240 The slope parameter was obtained by substituting  $x$  in the first derivative of the  $a, b, c$  parametrization (17) with the  
 1241 analytical solution for  $I_x$  from (18).

$$S = f'(I_x)$$

$$\Leftrightarrow S = b(e^c + 1)^{-1-e^{-c}} \quad (19)$$

1242 Substituting  $a$  in (17) with  $a(I_x, b, c)$  from (18) yields a parametrization in terms of  $I_x, b, c$  (20):

$$f(x) = (e^{b(I_x - x + \frac{c}{b}) + 1})e^{-c} \quad (20)$$

$$I_x, b, c \in \mathcal{R}$$

1243 For a parametrization in terms of both  $I_x$  and  $S$ , their equations from (18) and (19) must be solved for  $a$  and  $b$ :

$$a = \frac{I_x e^c}{e^c + 1} + \frac{I_x}{e^c + 1} + \frac{c(e^c + 1)^{-1-e^{-c}}}{S} \quad (21)$$

$$b = S(e^c + 1)^{(e^c + 1)e^{-c}}$$

1244 A parametrization in terms of  $I_x, S, c$  is then obtained by substitution of  $a$  and  $b$  in (17):

$$f(x) = (e^{(e^c + 1)^{(e^c + 1)e^{-c}} \cdot (I_x S - Sx + c(e^c + 1)^{-1-e^{-c}})} + 1)^{-e^{-c}} \quad (22)$$

$$I_x, S, c \in \mathcal{R}$$

1245 By common subexpression elimination (22) simplifies to (23).

$$f(x) = (e^{x_2 \cdot (I_x S - Sx + \frac{c}{x_2})} + 1)^{x_1}$$

$$x_0 = e^c + 1$$

$$x_1 = e^{-c} \quad (23)$$

$$x_2 = x_0^{x_0 \cdot x_1}$$

$$I_x, S, c \in \mathcal{R}$$

1246 The final generalized parametrization (12) in terms of  $L_L, L_U, I_x, S, c$  was obtained by scaling slope parameter and  
1247 function value with  $L_U - L_L$  and shifting by  $L_U$ . The corresponding Python implementation is shown in Code 6. For a  
1248 step by step derivation of (12), as well as its inverse using sympy we refer to the "Background Asymmetric Logsite"  
1249 Jupyter notebook in the calibr8 repository [31].

**Code 6:** Implementation of reparameterized asymmetric logistic function

```
1250 1 def asymmetric_logistic(x, theta):
1251 2     """5-parameter asymmetric logistic model.
1252 3
1253 4     Parameters
1254 5     -----
1255 6     x : array-like
1256 7         independent variable
1257 8     theta : array-like
1258 9         parameters of the logistic model
1259 10         L_L: lower asymptote
1260 11         L_U: upper asymptote
1261 12         I_x: x-value at inflection point
1262 13         S: slope at the inflection point
1263 14         c: symmetry parameter (0 is symmetric)
1264 15
1265 16     Returns
1266 17     -----
1267 18     y : array-like
1268 19         dependent variable
1269 20     """
1270 21     L_L, L_U, I_x, S, c = theta[:5]
1271 22     # common subexpressions
1272 23     s0 = numpy.exp(c) + 1
1273 24     s1 = numpy.exp(-c)
1274 25     s2 = s0 ** (s0 * s1)
1275 26     # re-scale the inflection point slope with the interval
1276 27     s3 = S / (L_U - L_L)
1277 28
1278 29     x = numpy.array(x)
1279 30     y = (numpy.exp(s2 * (s3 * (I_x - x) + c / s2)) + 1) ** -s1
1280 31     return L_L + (L_U-L_L) * y
```

## 1281 A.2 Implementation, planning and saving of calibrations

### Code 7: Convenience class BaseAsymmetricLogisticT

```
1282 1 class BaseAsymmetricLogisticT(BaseModelT):
1283 2     def __init__(
1284 3         self, *,
1285 4         independent_key:str, dependent_key:str,
1286 5         scale_degree:int=0,
1287 6         theta_names: Optional[Tuple[str]]=None,
1288 7     ):
1289 8         """ Template for a model with asymmetric logistic trend (mu)
1290 9         and polynomial scale (as a function of mu).
1291 10
1292 11         Parameters
1293 12         -----
1294 13         independent_key : str
1295 14             name of the independent variable
1296 15         dependent_key : str
1297 16             name of the dependent variable
1298 17         scale_degree : optional, int
1299 18             degree of the polynomial model describing the scale as a function of mu
1300 19         theta_names : optional, tuple of str
1301 20             may be used to set the names of the model parameters
1302 21         """
1303 22         self.scale_degree = scale_degree
1304 23         if theta_names is None:
1305 24             theta_names = tuple('L_L,L_U,I_x,S,c'.split(',')) + tuple(
1306 25                 f'scale_{d}'
1307 26                 for d in range(scale_degree + 1)
1308 27             ) + ('df',)
1309 28         super().__init__(independent_key, dependent_key, theta_names=theta_names)
```

### Code 8: Human-readable pipetting instructions for the serial dilution of biomass for the calibration experiment

```
1310 1 Serial dilution plan (0.00102 to 1.00) from at least 12232.0 µL stock and 54368.0 µL diluent:
1311 2 Prepare column 1 with [2000. 1727. 1491. 1287. 1111. 959.] µL from stock and fill up to 2000 µL
1312 3 Prepare column 2 with [538. 465. 401. 346. 299. 258.] µL from stock and fill up to 1300 µL
1313 4 Prepare column 3 with [223. 192. 166. 143. 124. 107.] µL from stock and fill up to 1300 µL
1314 5 Prepare column 4 with [92. 80. 69. 59. 51. 44.] µL from stock and fill up to 1300 µL
1315 6 Prepare column 5 with [39. 39. 39. 39. 39. 39.] µL from column 1 and fill up to 1300 µL (1 serial dilutions)
1316 7 Prepare column 6 with [39. 39. 39. 39. 39. 39.] µL from column 2 and fill up to 1300 µL (1 serial dilutions)
1317 8 Prepare column 7 with [39. 39. 39. 39. 39. 39.] µL from column 3 and fill up to 1300 µL (1 serial dilutions)
1318 9 Prepare column 8 with [39. 39. 39. 39. 39. 39.] µL from column 4 and fill up to 1300 µL (1 serial dilutions)
```

### Code 9: JSON file containing stored model properties.

```
1319 1 {
1320 2     "calibr8_version": "6.0.0",
1321 3     "model_type": "models.LogisticGlucoseCalibrationModelV1",
1322 4     "theta_names": [
1323 5         "L_L", "L_U", "I_x", "S", "c", "scale_0", "scale_1", "df"
1324 6     ],
1325 7     "theta_bounds": [
1326 8         [-Infinity, 0.3],
1327 9         [2, 5],
1328 10        [-50, 50],
1329 11        [0, 20],
1330 12        [-3, 3],
1331 13        [0, 0.1],
1332 14        [0, 0.06],
1333 15        [1, 20]
1334 16    ],
1335 17     "theta_guess": [0.1, 2.8, 1.2, 10, 1, 0.08, 0.01, 3],
1336 18     "theta_fitted": [
1337 19         -8.812, 2.765, 8.246, 0.0839,
```

Bayesian calibration, process modeling and uncertainty quantification in biotechnology

---

```
1339 20         2.69, 0.000374, 0.0154, 3.007
1340 21     ],
1341 22     "theta_timestamp": "2021-02-15T14:27:11Z",
1342 23     "independent_key": "glc",
1343 24     "dependent_key": "A365",
1344 25     "cal_independent": [
1345 26         50.0,
1346 27         27.94736842105263,
1347 28         ...
1348 29         0.05030330952033825
1349 30     ],
1350 31     "cal_dependent": [
1351 32         2.6449,
1352 33         2.2389,
1353 34         ...
1354 35         0.1166
1355 36     ]
1356 37 }
```



1358 **A.3 Process model parametrization, parameter estimates and MCMC results**

1359 The parametrization of the batch cultivation process model was given by the tabular notation of a  
1360 `murefi.ParameterMapping` [Table 2](#). Maximum likelihood estimates, posterior sample means, standard deviation,  
1361 HDI interval and  $\hat{R}$  statistic are shown in [Appendix A.3](#). Two-dimensional kernel densities of all posterior samples  
1362 are shown in [Figure 17](#).

**Table 2: Parameter mapping for fitting of Monod kinetics**

Repetitive rows were left out for clarity. The full length table has 28 rows.

| replicate | $S_0$ | $X_0$  | $\mu_{\max}$ | $K_S$ | $Y_{XS}$ |
|-----------|-------|--------|--------------|-------|----------|
| A02       | S0    | X0_A02 | mu_max       | 0.02  | Y_XS     |
| ...       | S0    | X0_A0. | mu_max       | 0.02  | Y_XS     |
| A08       | S0    | X0_A04 | mu_max       | 0.02  | Y_XS     |
| ...       | S0    | X0_... | mu_max       | 0.02  | Y_XS     |
| D08       | S0    | X0_D08 | mu_max       | 0.02  | Y_XS     |

**Table 3: Parameter estimates from MLE and MCMC**

|               | MLE   | mean  | sd    | hdi_5% | hdi_95% | r_hat |
|---------------|-------|-------|-------|--------|---------|-------|
| <b>S0</b>     | 16.92 | 15.23 | 0.103 | 15.06  | 15.40   | 1.0   |
| <b>mu_max</b> | 0.425 | 0.425 | 0.001 | 0.424  | 0.426   | 1.0   |
| <b>Y_XS</b>   | 0.673 | 0.747 | 0.005 | 0.739  | 0.756   | 1.0   |
| <b>X0_mu</b>  | -     | 0.269 | 0.010 | 0.252  | 0.285   | 1.0   |
| <b>X0_A02</b> | 0.231 | 0.266 | 0.053 | 0.179  | 0.348   | 1.0   |
| <b>X0_A03</b> | 0.335 | 0.341 | 0.022 | 0.304  | 0.377   | 1.0   |
| <b>X0_A04</b> | 0.301 | 0.299 | 0.006 | 0.289  | 0.310   | 1.0   |
| <b>X0_A05</b> | 0.267 | 0.267 | 0.002 | 0.263  | 0.271   | 1.0   |
| <b>X0_A06</b> | 0.250 | 0.250 | 0.002 | 0.247  | 0.252   | 1.0   |
| <b>X0_A07</b> | 0.252 | 0.252 | 0.002 | 0.250  | 0.255   | 1.0   |
| <b>X0_A08</b> | 0.241 | 0.241 | 0.002 | 0.238  | 0.244   | 1.0   |
| <b>X0_B02</b> | 0.297 | 0.277 | 0.047 | 0.200  | 0.354   | 1.0   |
| <b>X0_B03</b> | 0.356 | 0.345 | 0.015 | 0.321  | 0.369   | 1.0   |
| <b>X0_B04</b> | 0.291 | 0.292 | 0.005 | 0.285  | 0.300   | 1.0   |
| <b>X0_B05</b> | 0.256 | 0.255 | 0.002 | 0.252  | 0.258   | 1.0   |
| <b>X0_B06</b> | 0.252 | 0.252 | 0.002 | 0.249  | 0.255   | 1.0   |
| <b>X0_B07</b> | 0.256 | 0.256 | 0.002 | 0.253  | 0.259   | 1.0   |
| <b>X0_B08</b> | 0.240 | 0.240 | 0.002 | 0.237  | 0.242   | 1.0   |
| <b>X0_C02</b> | 0.416 | 0.333 | 0.041 | 0.266  | 0.400   | 1.0   |
| <b>X0_C03</b> | 0.314 | 0.318 | 0.012 | 0.299  | 0.337   | 1.0   |
| <b>X0_C04</b> | 0.273 | 0.273 | 0.004 | 0.267  | 0.279   | 1.0   |
| <b>X0_C05</b> | 0.251 | 0.250 | 0.002 | 0.248  | 0.253   | 1.0   |
| <b>X0_C06</b> | 0.257 | 0.257 | 0.002 | 0.255  | 0.260   | 1.0   |
| <b>X0_C07</b> | 0.240 | 0.240 | 0.002 | 0.237  | 0.243   | 1.0   |
| <b>X0_C08</b> | 0.241 | 0.241 | 0.002 | 0.238  | 0.243   | 1.0   |
| <b>X0_D02</b> | 0.380 | 0.338 | 0.030 | 0.289  | 0.388   | 1.0   |
| <b>X0_D03</b> | 0.315 | 0.317 | 0.009 | 0.303  | 0.332   | 1.0   |
| <b>X0_D04</b> | 0.275 | 0.275 | 0.003 | 0.270  | 0.280   | 1.0   |
| <b>X0_D05</b> | 0.256 | 0.256 | 0.002 | 0.253  | 0.258   | 1.0   |
| <b>X0_D06</b> | 0.248 | 0.248 | 0.002 | 0.246  | 0.251   | 1.0   |
| <b>X0_D07</b> | 0.241 | 0.242 | 0.002 | 0.239  | 0.244   | 1.0   |
| <b>X0_D08</b> | 0.250 | 0.249 | 0.002 | 0.247  | 0.252   | 1.0   |

Bayesian calibration, process modeling and uncertainty quantification in biotechnology

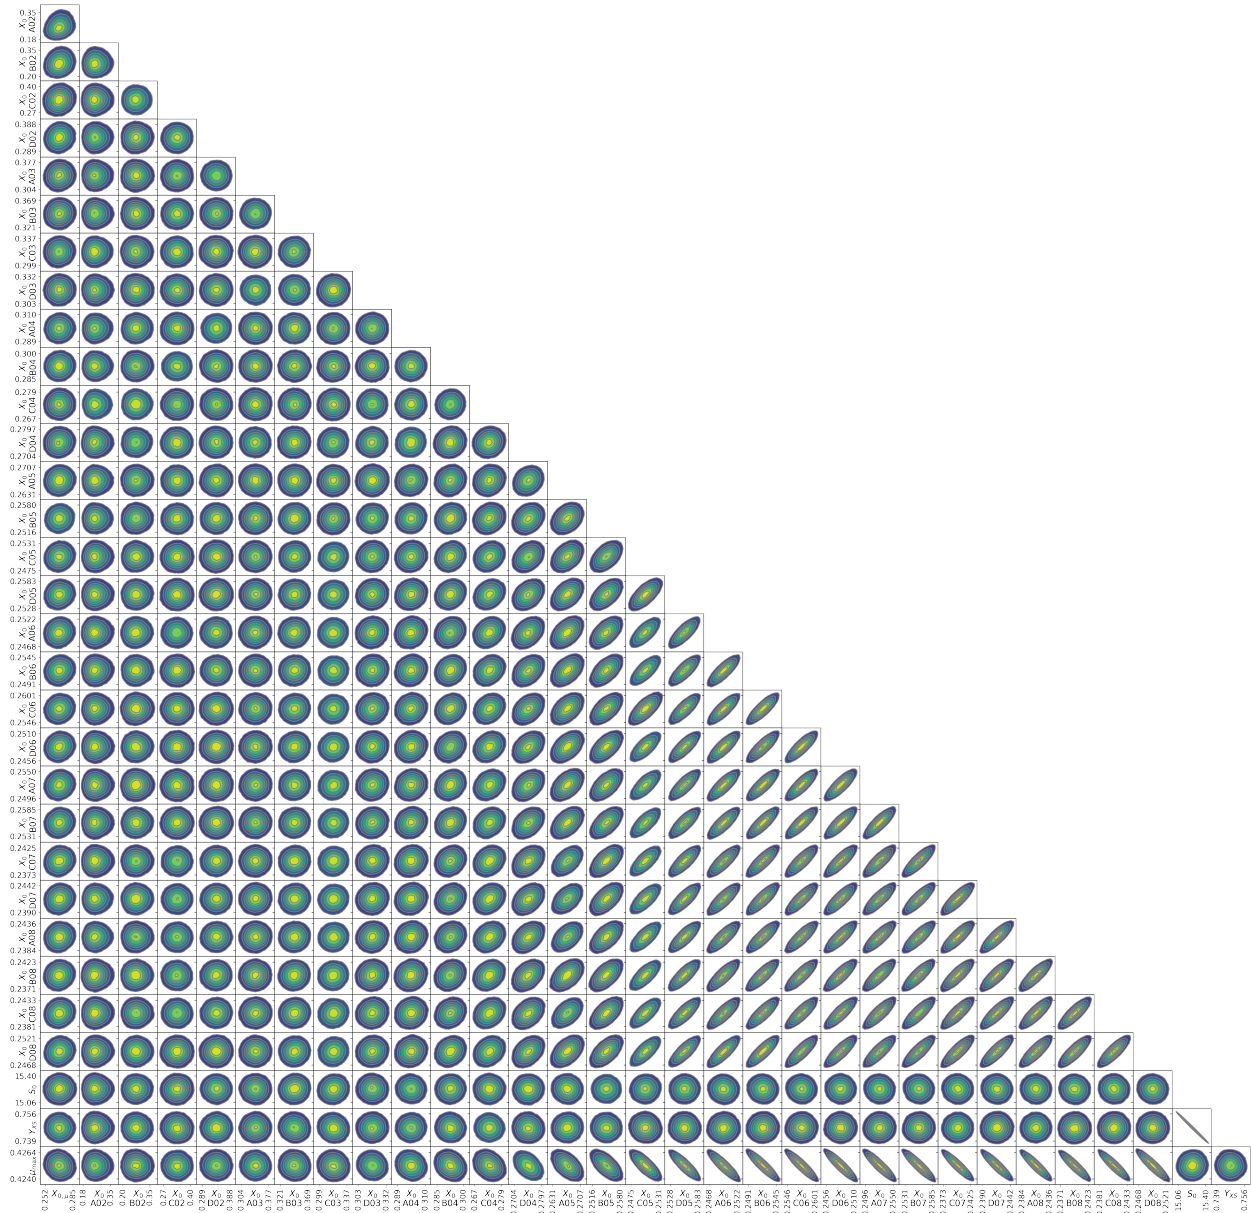

**Figure 17: Pair plot of marginal posterior distribution**

Axis labels mark the 90 % HDI and subplot axis limits are set at the 98 % HDI. Units are  $h^{-1}$  for  $\mu_{\max}$ ,  $\frac{g_{\text{glucose}}}{g_{\text{biomass}}}$  for  $Y_{XS}$  and  $\frac{g}{L}$  for  $S_0$  and  $X_0$ .
